# GENERATING AND TESTING HYPOTHESES ABOUT THE FOSSIL RECORD OF INSECT HERBIVORY WITH A THEORETICAL ECOSPACE

Sandra R. Schachat<sup>1,\*</sup>, Jonathan L. Payne<sup>1</sup>, C. Kevin Boyce<sup>1</sup>, Conrad C. Labandeira<sup>2,3,4</sup>

1. Department of Geological Sciences, Stanford University, Stanford, CA, United States

2. Department of Paleobiology, National Museum of Natural History, Smithsonian Institution, Washington, DC, United States

3. Department of Entomology, University of Maryland, College Park, College Park, MD, United States

4. College of Life Sciences, Academy for Multidisciplinary Studies, Capital Normal University, Beijing, China

\* Author for correspondence: [sschachat@schmidtsciencefellows.org](mailto:sschachat@schmidtsciencefellows.org)

## Abstract

A typical fossil flora examined for insect herbivory contains a few hundred leaves and a dozen or two insect damage types. Paleontologists employ a wide variety of metrics to assess differences in herbivory among assemblages: damage type diversity, intensity (the proportion of leaves, or of leaf surface area, with insect damage), the evenness of diversity, and comparisons of the evenness and diversity of the flora to the evenness and diversity of damage types. Although the number of metrics calculated is quite large, given the amount of data that is usually available, the study of insect herbivory in the fossil record still lacks a quantitative framework that can be used to distinguish among different causes of increased insect herbivory and to generate null hypotheses of the magnitude of changes in insect herbivory over time. Moreover, estimates of damage type diversity, the most common metric, are generated with inconsistent sampling standardization routines. Here we demonstrate that coverage-based rarefaction yields valid, reliable estimates of damage type diversity that are robust to differences among floral assemblages in the number of leaves examined, average leaf surface area, and the inclusion of plant organs other than leaves such as seeds and axes. We outline the potential of a theoretical ecospace that combines various metrics to distinguish between potential causes of increased herbivory. We close with a discussion of the most appropriate uses of a theoretical ecospace for insect herbivory, with the overlapping damage type diversities of Paleozoic gymnosperms and Cenozoic angiosperms as a brief case study.

## 1 INTRODUCTION

In recent years, the number of fossil plant assemblages examined for insect herbivory has increased markedly. The wealth of available data has already been used to inform a variety of biotic and abiotic phenomena

31 (Smith, 2008; Carvalho et al., 2014; Labandeira and Currano, 2013), but raises the question of how to  
32 compare the patterns of insect herbivory observed on different host plants or in different assemblages.

33 An increase in herbivory in deep time can occur in response to various environmental and evolutionary  
34 phenomena, demonstrating the need for analytical techniques that can be used to distinguish among them.  
35 Two explanations that are commonly invoked as causes of increased insect herbivory are insect and plant  
36 evolution, which lead to an expanded suite of feeding behaviors (Labandeira, 2006; Martinez et al., 2019;  
37 Wagner et al., 2015), and the nutrient dilution hypothesis, in which a sudden increase in atmospheric  $p\text{CO}_2$   
38 increases the carbon-to-nitrogen ratio in many plant tissues, increasing the amount of leaf area that each  
39 insect must consume in order to ingest a given amount of protein (Bazzaz, 1990). The techniques currently  
40 used in paleontological studies do not distinguish among these disparate causes of increased herbivory.

41 A standardized method for comparing insect herbivory would allow the use of published data to generate  
42 null expectations for findings at new localities. In addition, a standardized method would facilitate the  
43 differentiation of these and other causes of increased insect herbivory in cases where the distinction is not so  
44 clear.

## 45 1.1 THE END-TRIASSIC AS A HYPOTHETICAL CASE STUDY

46 The end-Triassic extinction event exemplifies the potential utility of statistical methods with the capacity  
47 to generate null expectations and disentangle the various potential causes of fluctuations in herbivory. Few  
48 latest Triassic floras have been examined for insect herbivory (Ghosh et al., 2015) and, of the geologic  
49 periods that contain more than five described insect fossils, the Jurassic is the least studied in this context  
50 (McLoughlin et al., 2015; Ding et al., 2015; Pinheiro et al., 2016; Na et al., 2018; Santos et al., 2021).

51 One could generate any number of predictions about changes in insect herbivory across the end-Triassic  
52 event. Patterns of insect herbivory may have remained constant because it is widely agreed that insects  
53 did not suffer major losses at the Triassic/Jurassic boundary (Dmitriev and Zherikin, 1988; Labandeira  
54 and Sepkoski, 1993; Jarzembowski and Ross, 1996). Insect herbivory may have decreased because plant  
55 communities do appear to have endured noticeable turnover and losses across this extinction event (Belcher  
56 et al., 2010; Li et al., 2020; Lucas, 2021; McElwain and Punyasena, 2007). The  $p\text{CO}_2$  spike associated with  
57 the end-Triassic event (Knobbe and Schaller, 2017) complicates matters further. Whether or not an increase  
58 in  $p\text{CO}_2$  led to an increase in plant biomass and a corresponding dilution of nutrients such as nitrogen  
59 (Mattson, 1980) depends greatly on interacting environmental parameters (Shaw et al., 2002; McMurtrie  
60 et al., 2008; Reich et al., 2014). Nutrient dilution has very rarely been directly examined in the plant clades  
61 that were present in Triassic and Jurassic ecosystems; this phenomenon has been studied almost exclusively

62 in angiosperms, which had not yet evolved at the time of the end-Triassic event (Bazzaz, 1990; Boyce and  
63 Zwieniecki, 2012; Ramírez-Barahona et al., 2020).

64 If data were available, a comparison of insect herbivory levels immediately before and after the end-  
65 Triassic event would be hampered by the lack of available statistical techniques. The first obstacle would be  
66 the lack of a null, or baseline, prediction of the magnitude of change in insect herbivory that would occur  
67 from the Late Triassic to Early Jurassic in the absence of a major environmental or evolutionary event. How  
68 much variation in insect herbivory is best attributed to statistical noise? How much is best attributed to the  
69 passage of time rather than an external trigger? After these sources of variation are taken into account, how  
70 much variation remains? The fern- and gymnosperm-dominated Permian, Triassic, and Cretaceous floras  
71 that have already been examined for insect herbivory provide an opportunity to generate a null prediction  
72 and quantify the uncertainty surrounding it. What is needed is a comparative framework to generate this  
73 null prediction.

74 The second obstacle would be the lack of a comparative framework for disentangling the biotic and  
75 abiotic causes of fluctuations in insect herbivory. The environmental perturbation most thoroughly  
76 examined in existing studies of insect herbivory, the Paleocene–Eocene Thermal Maximum, or PETM (Wilf  
77 and Labandeira, 1999; Currano et al., 2008, 2016), began and ended far too quickly for much plant or  
78 insect evolution to have occurred (Zeebe and Lourens, 2019). Many other environmental perturbations,  
79 such as the increase in  $p\text{CO}_2$  at the end-Triassic, which occurred in multiple pulses (Ruhl and Kürschner,  
80 2011), span a long enough interval that abiotic and biotic factors can be confounded.

## 81 1.2 THEORETICAL ECOSPACES IN PALEONTOLOGY

82 Morphospaces are a useful tool for quantifying change over time. The axes of empirical morphospaces,  
83 constructed with techniques such as principal component analysis, change with the addition of new data; in  
84 contrast, the axes of theoretical morphospaces remain unchanged as new data are added (McGhee, 2006).  
85 Morphospaces can be multidimensional (Raup, 1967; Lohman et al., 2017), can consist of various two-  
86 dimensional comparisons (Wilson and Knoll, 2010), or, with sufficiently clear and specific hypotheses, require  
87 only two dimensions (Raup, 1967; Gerber, 2017; Balisi and Van Valkenburgh, 2020).

88 Ecospace extend the logic of empirical and theoretical morphospaces to ecological data. The canonical  
89 use of ecospace in paleontology applies to the marine realm (Valentine, 1969; Bambach, 1983), with an  
90 updated version now forming the foundation of many quantitative studies (Bush et al., 2007; Wiedl et al.,  
91 2013; Knope et al., 2015; Mondal and Harries, 2016; Frey et al., 2018; Laing et al., 2019). The three-  
92 dimensional ecospace as updated by Bush et al. (2007) has also been modified for the sedimentary ichnological

93 study of terrestrialization (Minter et al., 2017) and for the study of terrestrial vertebrates (Chen et al., 2019).  
94 The primary difference between the two ecospace formulations currently used in studies of marine animals is  
95 the number of characters and character states (Novack-Gottshall, 2007; Bush and Novack-Gottshall, 2012).  
96 Of note, both theoretical ecospace for marine animals use qualitative character states (Novack-Gottshall,  
97 2007; Bush et al., 2007).

## 98 2 A THEORETICAL ECOSPACE FOR INSECT HERBIVORY IN THE 99 FOSSIL RECORD

100 Studies of insect herbivory typically use at least one of three common metrics. The diversity of insect damage  
101 types (Labandeira et al., 2007) measures the richness of herbivory. The percentage of leaf area removed by  
102 herbivores (known as the herbivory index) and the percentage of leaf specimens with feeding damage both  
103 measure the intensity of herbivory; however, the latter is highly sensitive to leaf size, behaves differently from  
104 the herbivory index (Smith, 2008), and thus is not recommended as an alternative to the former (Schachat  
105 et al., 2018). Although damage type diversity and the herbivory index are often discussed interchangeably,  
106 with an increase in either referred to as “more herbivory,” they measure fundamentally different aspects of  
107 herbivory (Figure 1).

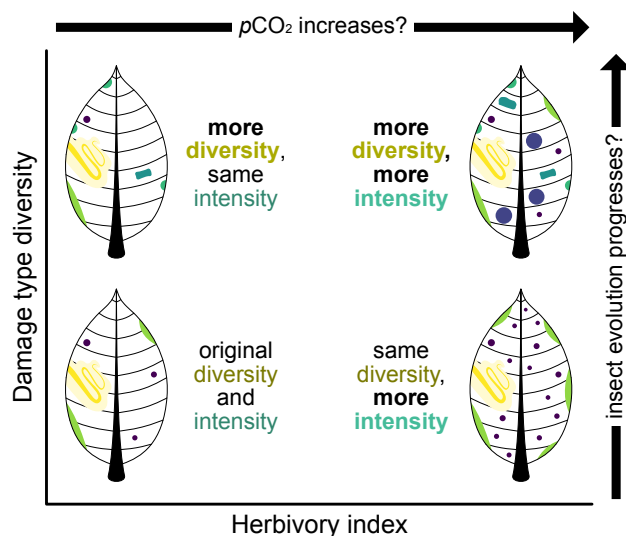

Figure 1: The difference between the diversity and intensity of insect herbivory.

108 The simplest theoretical ecospace for insect herbivory consists of damage type diversity plotted against  
109 the herbivory index. Although this ecospace has not been illustrated or analyzed in previous studies, it holds  
110 the potential to disentangle the various causes of increased herbivory.

## 2.1 THE UTILITY OF AN ECOSPACE

111  
112 The dilution of nitrogen in leaves, caused by increased plant biomass, in turn caused by increased  $p\text{CO}_2$ , will  
113 increase the amount of leaf biomass that an herbivore will need to consume in order to ingest enough protein  
114 to satisfy its metabolic demands. In other words, an increase in  $p\text{CO}_2$  is predicted to cause an increase in  
115 the intensity of insect herbivory. The increased intensity of herbivory may well permit an increase in the  
116 observed diversity of herbivory because the more leaf mass is consumed, the more opportunities there are  
117 for the preservation of additional damage types that were present at low frequencies. However, this need  
118 not necessarily be the case. When the intensity of herbivory increases, the diversity of herbivory can remain  
119 constant or can even decrease.

120 In contrast, the expanding suite of insect feeding behaviors that developed from the Carboniferous through  
121 Permian increased the diversity of herbivory more measurably and consistently than it increased the intensity  
122 of herbivory. Whereas arthropod herbivory, probably caused by mites, has been found on Devonian liverworts  
123 (Labandeira et al., 2013), the oldest known insect herbivory in the fossil record consists only of external  
124 foliage feeding, with no accompanying piercing and sucking or specialized behaviors such as galling and  
125 mining (Iannuzzi and Labandeira, 2008). The size of the archetypal herbivorous arthropod and its feeding  
126 traces increased, but exhibited no more sophistication or diversity of feeding behavior than already seen with  
127 probable mite herbivory on Devonian liverworts. As another example, definitive evidence of leaf mining only  
128 appears in the earliest Mesozoic—tens of millions of years after insects began eating plants (Labandeira et al.,  
129 1994; Ding et al., 2014)—at a time when the diversity of gall-inducing arthropods also increased (Labandeira,  
130 2021). An increase in the diversity of insect herbivory does not necessitate a corresponding increase in the  
131 intensity of herbivory: for example, some Permian gymnosperms have herbivory indices between 3.08%  
132 (Schachat et al., 2014) and 3.95% (Beck and Labandeira, 1998). These represent the twenty-sixth and  
133 thirty-second percentiles, respectively, of angiosperm leaf area removed per year by insect herbivores in  
134 extant ecosystems—slightly less than the mean value (Turcotte et al., 2014).

135 Thus, a bivariate theoretical ecospace can be used to differentiate among the expected impacts of nitrogen  
136 dilution versus insect and plant evolution as potential causes of increased insect herbivory. An increase in  
137 the diversity of herbivory that outpaces the intensity of herbivory is consistent with insect evolution but not  
138 with nitrogen dilution, and vice-versa.

139 The cyclical Holocene range expansions and contractions of eastern hemlock, *Tsuga canadensis* L.,  
140 illustrate why the distinction between the diversity and intensity of herbivory matters (Labandeira, 2012).  
141 The decline of hemlock is believed to have been caused by either climate change or outbreaks of insect  
142 herbivores (Foster et al., 2006). Increased herbivory on subfossil hemlock leaves would support the

143 hypothesis that insects drove eastern hemlock into decline, but only if an increase in the intensity of  
144 herbivory exceeds any increase in the diversity of herbivory. The intensity of herbivory would need to  
145 increase more strongly than the diversity of herbivory in order for the insect-outbreak hypothesis to be  
146 supported because, of the myriad insects known to feed on eastern hemlock (Buck et al., 2005; Dilling  
147 et al., 2007), only three—two moths and one conifer aphid—have been identified as possible culprits in the  
148 Holocene decline of this species (Filion et al., 2006; Simard et al., 2002; Oswald, 2016; Orwig and Foster,  
149 1998; Labandeira, 2012). Moreover, due to indirect interspecific competition among insect herbivores  
150 (Janzen, 1973; Price et al., 1980; van Veen et al., 2006; Kaplan and Denno, 2007), an outbreak of a single  
151 herbivore species would quite possibly decrease the total diversity of insect herbivory through suppression  
152 of other herbivores. Therefore, range contractions of eastern hemlock caused by insect herbivores would  
153 require an increase in the intensity, but not the diversity, of herbivory.

## 154 2.2 ESTIMATING DAMAGE TYPE DIVERSITY FOR AN ECOSPACE

155 Because differences in sampling completeness threaten to bias estimates of damage type diversity (Schachat  
156 et al., 2018), the act of comparing damage type diversity to the herbivory index is no simple task. Estimates  
157 of the herbivory index are largely robust to differences in sample size: as sampling intensity increases,  
158 confidence intervals become narrower but point estimates of the herbivory index do not change perceptibly  
159 because a mean is an unbiased estimator (Schachat et al., 2018). For damage type diversity, on the other  
160 hand, point estimates and the ranges of confidence intervals vary substantially with sampling intensity  
161 because a tally—in this case, a tally of the damage types observed—is a biased estimator that continues  
162 to increase as sampling progresses. This is illustrated by the Colwell Creek Pond and Mitchell Creek Flats  
163 assemblages from the Early Permian of Texas (Schachat et al., 2014, 2015) which overlap considerably in  
164 composition of their floral communities but vary in sampling completeness; the former contains over fifteen  
165 times as much broadleaf surface area and over five times as many broadleaf specimens as the latter (Figure  
166 S1). As detailed in the supplemental material, we found that the Chao1 estimator is unable to overcome the  
167 lack of sampling completeness in insect herbivory datasets. This estimator returns inaccurate and imprecise  
168 estimates of damage type diversity whether used alone (Chao, 1987) or in conjunction with rarefaction (Chao  
169 et al., 2014).

170 Coverage-based rarefaction provides an alternative to traditional rarefaction (Chao and Jost, 2012). In  
171 traditional, or size-based, rarefaction, curves are scaled by the number of leaves or the amount of leaf area  
172 examined. In coverage-based rarefaction, samples are standardized by sampling completeness as indicated  
173 by the slope of the rarefaction curve (Good, 1953; Jost, 2010). At the base of a rarefaction curve, sampling

174 is incomplete; the slope of the rarefaction curve equals 1 and coverage equals 0. As sampling approaches  
175 completeness, the slope of the rarefaction curve reaches an asymptote—*i.e.*, a slope of 0—and coverage  
176 equals 1 (Figure 2). Thus, with coverage-based rarefaction, damage type datasets are rarefied not to a  
177 particular number of leaves but to a particular slope of the rarefaction curve. If a high proportion of damage  
178 types are observed on only one specimen, this indicates that coverage is relatively low. In contrast, if a low  
179 proportion of damage types are observed on only one specimen, coverage is relatively high. Coverage-based  
180 rarefaction is performed by removing the rarest damage types from the dataset until coverage is reduced to  
181 a predetermined threshold such as 0.8 (Figure 3).

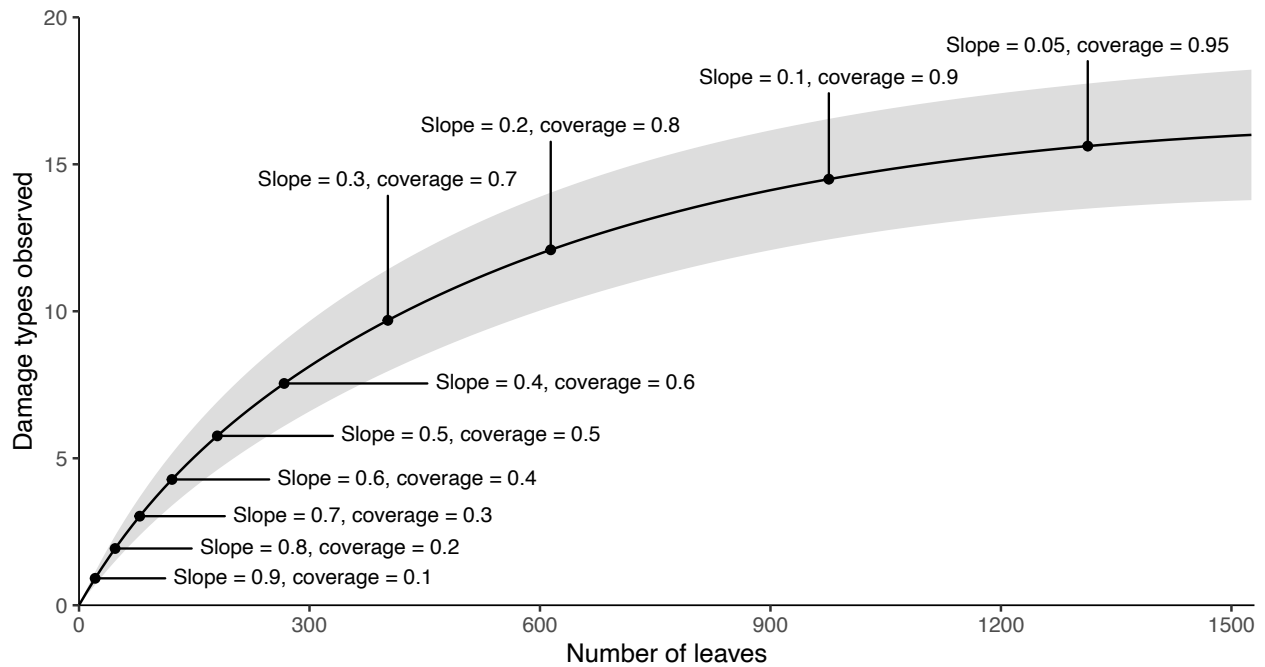

Figure 2: An illustration of the relationship between size-based and coverage-based rarefaction, showing that sample coverage is determined by subtracting the slope of the rarefaction curve from 1. These data are from the Hlatimbe Valley 213 assemblage (Labandeira et al., 2018), which was selected for inclusion here because it is also featured in Figure 3.

(A) Nuwejaarspruit 111B, sample coverage = 0.82

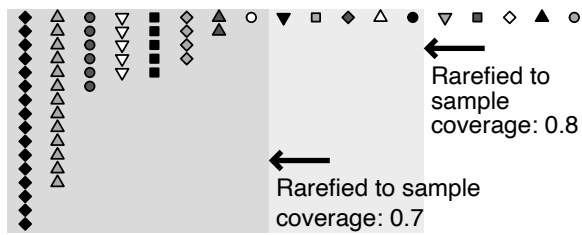

(B) Sani Pass 111, sample coverage = 0.85

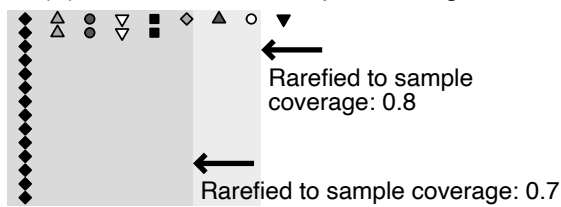

(C) Klein Hoek 111B, sample coverage = 0.90

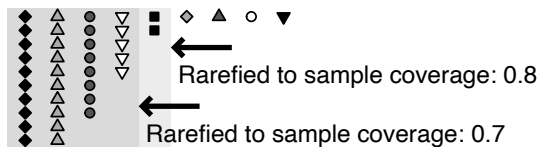

(D) Greenvale 121, sample coverage = 0.95

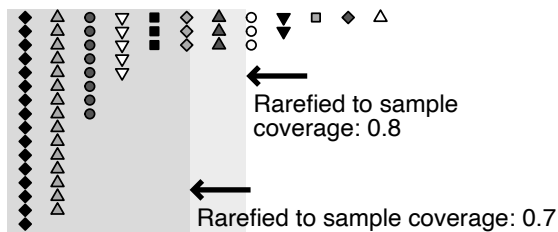

(E) Hlatimbe Valley 213, sample coverage = 0.97

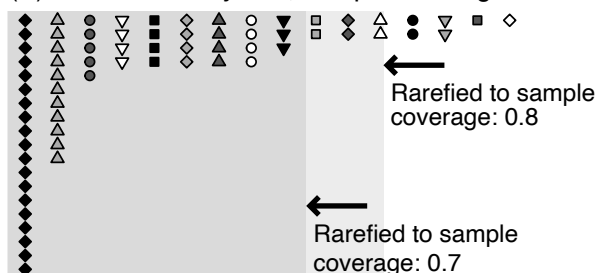

Figure 3: An illustration of the concepts of sample coverage and of rarefaction by sample coverage. The five assemblages illustrated here were examined by [Labandeira et al. \(2018\)](#). For each assemblage, the sample coverage for the complete dataset is listed in the title. The lightest gray boxes denote the damage type diversity at each assemblage when rarefied to a sample coverage of 0.8, and the darker gray boxes denote damage type diversity rarefied to a sample coverage of 0.7. The assemblages are organized from the lowest to highest levels of sample coverage. Each column of symbols represents a damage type, and the number of times each symbol is illustrated represents the number of specimens on which the damage type was observed. (A) has relatively low sample coverage because the majority of damage types are observed on only one specimen. In contrast, (E) has relatively high sample coverage because so few damage types are observed on only one specimen.



182 Because coverage-based rarefaction follows the replication principle (Chao and Jost, 2012) it provides  
183 an unbiased and consistent estimator of damage type diversity that is robust to sample size, leaf size, and  
184 fragmentation. In statistical parlance, an “unbiased estimator” is an estimator whose average expected value  
185 for a sample is equal to the true value in the population from which the sample was drawn. In other words,  
186 whether the dataset for a given fossil assemblage reaches a sample coverage of 0.85 or 0.99, the estimated  
187 damage type diversity will, on average, be the same when the dataset is rarefied down to a sample coverage of  
188 0.8. A “consistent estimator” converges on the true population value as sample size becomes large. In other  
189 words, if one fossil assemblage reaches a sample coverage of 0.85 and another reaches a sample coverage of  
190 0.99, the uncertainty surrounding damage type diversity rarefied to a sample coverage of 0.8 will be smaller  
191 for the latter, more completely-sampled assemblage. The assemblages listed in Tables 1 and 2 with over  
192 7,000 leaves examined were randomly subsampled down to 1,000 and 2,000 leaves in a procedure that was  
193 iterated 1,000 times (Figure 4). Whereas accuracy and precision typically suffer when these assemblages are  
194 subsampled down to 1,000 or even 2,000 leaves before performing traditional, size-based rarefaction (Figure  
195 S3), the loss of precision and accuracy are minimal with coverage-based rarefaction (Figure 4). The loss of  
196 precision with coverage-based rarefaction is far less severe than with size-based rarefaction (Figure S3) or  
197 with the Chao1 estimator (Figure S2) and still allows the differentiation of damage type diversity among  
198 many assemblages. With coverage-based rarefaction, the most notable lack of overlap among the confidence  
199 intervals for the different sample sizes occurs for Clouston Farm (Figure 4). The confidence intervals overlap  
200 to a reassuring extent for half of the pre-angiosperm and all of the angiosperm assemblages (Figure 4).

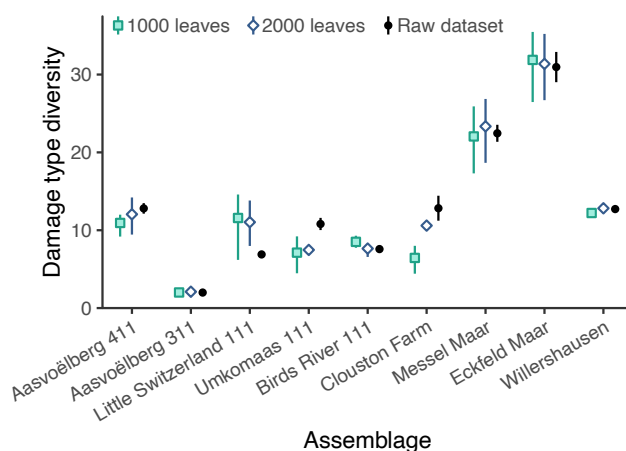

Figure 4: Precision and accuracy of estimates of damage type diversity generated with coverage-based rarefaction.

201 An additional benefit of coverage-based rarefaction is that, because samples are standardized by  
202 damage type completeness rather than number of leaves examined, this method is relatively robust to the

203 variable inclusion of non-broadleaf specimens, from pine needles to axes to seeds, in the datasets for  
204 different assemblages. Some published comparisons of insect herbivory among assemblages include  
205 broadleaf specimens only, whereas others include all plant specimens. Some floral assemblages do not  
206 contain any seeds and other non-foliar specimens, and of those that do, the non-foliar specimens may or  
207 may not be included in published datasets. Within angiosperm-dominated floras, ferns, gymnosperms, and  
208 monocots may (Robledo et al., 2018; Giraldo et al., 2021) or may not (Azevedo Schmidt et al., 2019;  
209 Currano et al., 2019) be examined. Criteria for inclusion in comparative analyses can even vary within the  
210 same research group, with some workers using a wider definition of foliage that includes needles, liverworts,  
211 phyllids, photosynthetic wings of seeds, and even flattened horsetail axes (Prevec et al., 2009; Labandeira  
212 et al., 2018), and others using a narrower definition restricted to multi-veined broad leaves or leaves with a  
213 defined midvein (Schachat et al., 2014, 2015, 2018, 2020). (For additional information, see “criteria for  
214 inclusion of leaves and damage types” in the supplemental information.)

215 Because non-broadleaf specimens typically contain little or no evidence of insect herbivory, they contribute  
216 little or nothing to metrics of damage type sampling completeness and will therefore have minimal or no  
217 impact on estimates of damage type diversity at an assemblage. And, because some herbivory datasets code  
218 plants as morphotypes only, with no information on whether the morphotype represents a dicot or a conifer  
219 (Maccracken, 2020), these datasets cannot be analyzed with traditional size-based rarefaction. However,  
220 these datasets can indeed be analyzed with coverage-based rarefaction. Plant organs that contain little or no  
221 insect damage, such as axes and pine needles, contribute little or nothing to estimates of sample coverage,  
222 and thus their inclusion in coverage-based damage diversity estimates does not bias the estimates downward.

223 A remaining question is the confidence level that should be used in confidence intervals for rarefied  
224 damage type diversity. Schachat et al. (2018) used 84% confidence intervals, rather than 95%, because the  
225 comparison of two curves with 84% confidence intervals yields a Type I error rate below 5%. However, the  
226 confidence intervals generated with the iNEXT package rely in part on extrapolated diversity, which is shown  
227 above to be biased by sample size in the case of damage type diversity datasets. As a result, the confidence  
228 intervals generated by iNEXT are narrower than those generated with the iterative procedure of Schachat  
229 et al. (2018). Therefore, we recommend generating 95% confidence intervals with the iNEXT package for use  
230 in the ecospace.

### 231 2.2.1 CONSIDERATIONS FOR ASSEMBLAGES WITH INSUFFICIENT COVERAGE

232 Just as size-based rarefied estimates of damage type diversity are conducted at a predetermined level of  
233 sampling, such as 400 leaves, coverage-based rarefied estimates of damage type diversity require a  
234 predetermined level of coverage, or sampling completeness. Here we rarefy to sample coverage 0.8.

235 Coverage increases throughout the sampling process as a function of sample size, the evenness of damage  
236 types, the richness of damage types, and the frequency with which damage types occur. Accordingly, there  
237 is no predetermined number of leaves or amount of surface area at which an assemblage is assured to have  
238 sufficient coverage.

239 The impossibility of assessing all assemblages that have been sampled to a certain size, such as 400 leaves  
240 or 1000 cm<sup>2</sup> of surface area, is perhaps the only disadvantage of using coverage-based rarefaction instead of  
241 size-based rarefaction. Five of the assemblages in Tables 1 and 2 have insufficient coverage for rarefaction  
242 to sampling completeness of 0.8: the Permian Wuda (Feng et al., 2020) and Bletterbach (Bernardi et al.,  
243 2017) assemblages, and the Triassic Qachasnek 111, Kraai River 111, and Konings Kroon 222 assemblages  
244 (Labandeira et al., 2018). (The Triassic Makoaneng 111 and Konings Kroon 111A assemblages both have a  
245 total sample coverage of 0.79. We extrapolated the damage type diversity at a sample coverage of 0.8 for  
246 these two assemblages, but do not recommend extrapolating diversity estimates for assemblages with coverage  
247 below 0.79, as discussed in the supplemental material.) All of these contain little damage. Of note, the  
248 Boesmanshkoek 112 assemblage from the same Triassic study contains only two damage types, but these  
249 occur frequently enough that the assemblage has sufficient coverage. Thirty-nine of the 44 assemblages  
250 with fewer than 1,000 leaves listed in Table 3 have sufficient coverage as well. Of the ten assemblages with  
251 coverage below 0.79, eight have values between 0.45 and 0.69, and the remaining two assemblages have values  
252 of 0.70 and 0.72. Rarefying to a sample coverage of 0.7 would decrease the power to detect differences among  
253 assemblages while providing a negligible increase in the number of assemblages included.

254 The best way to handle assemblages with insufficient coverage depends on the number of leaves examined  
255 and the temporal scope of the study. In the case of assemblages with only a few hundred leaves, estimates  
256 of damage type diversity comparable to those generated with coverage-based simply cannot be calculated.  
257 For studies such as that of Labandeira et al. (2002b) with a limited temporal scope and a large quantity of  
258 assemblages, many of which contain small numbers of leaves, the exclusion of assemblages that do not reach  
259 sufficient sample coverage can decrease the power of the study to detect changes in herbivory through time  
260 by excluding assemblages whose low sample coverage may be due to insufficient sampling or a true scarcity  
261 of damage types. In cases such as this, size-based rarefaction curves scaled by the amount of surface area  
262 sampled rather than the number of leaves sampled (Schachat et al., 2018) are the most appropriate choice.  
263 These size-based estimates of damage type diversity cannot be incorporated into meta-analyses that use  
264 coverage-based rarefaction. We conducted simulations to evaluate extrapolated estimates of damage type  
265 diversity in cases when the raw dataset does not reach a sample coverage of 0.8, and found that extrapolated  
266 estimates are not reliable and are often invalid (Figure S4).

## 2.3 EVALUATING OTHER POTENTIAL DIMENSIONS OF AN ECOSPACE FOR HERBIVORY

Whereas the intensity and diversity of insect damage are the two most commonly studied aspects of insect herbivory and are the two most obvious choices for dimensions of an ecospace, additional dimensions bear consideration. Examples discussed here include the proportion of feeding occurrences belonging to external foliage feeding and to piercing and sucking; damage type evenness; damage type evenness compared to floral evenness; floral diversity; damage type diversity compared to floral diversity; and the prevalence of each functional feeding group, best quantified through the amount of herbivorized surface area. Feeding occurrences are defined here as the number of times that a damage type occurs on an individual plant specimen; these data are rarely collected in studies of fossil herbivory (Robledo et al., 2018; Ma et al., 2020).

The first additional dimension is the prevalence of external foliage feeding, a functional feeding group containing generalist modes of herbivory in which an insect typically chews on a leaf. The proportion of feeding occurrences belonging to external foliage feeding—as opposed to piercing and sucking or specialized herbivory such as mining and galling—is perhaps the metric with the greatest potential to distinguish between insect evolution and nutrient dilution, the two most common explanations of increased herbivory invoked by paleontologists.

When nutrient dilution occurs, the prevalence of piercing-and-sucking feeding damage—whether measured as number of damage types, percentage of leaf area damaged, or number of feeding occurrences—will likely remain constant. This is because piercing-and-sucking insects often feed by puncturing individual phloem cells (Will et al., 2013). Whereas the number of phloem cells may increase in response to nutrient dilution, the content of each cell and the pressure within each cell will most likely remain the same. Therefore, piercing-and-sucking insects that feed on phloem will not need to feed more in order to meet their nutritional requirements. Similarly, when nutrient dilution occurs, the number of specialized mining and galling damage types is unlikely to increase, as is the number of occurrences of these damage types. Gall-inducing insects hijack their host plant’s metabolism; their control over the tissues that form galls may well be sufficient to shield them from the effects of nutrient dilution. However, the amount of surface area lost to mining may increase if larvae need to make longer mines in order to fulfill their nutritional requirements. External foliage feeding is the only broad category of herbivory for which one would expect to see the number of feeding event occurrences increase with nutrient dilution. External foliage feeders, like leaf miners, will need to consume more leaf surface area if nutrient dilution reduces the nutritional quality of the leaf blade. And unlike leaf miners, external foliage feeders have the opportunity to partition the additional leaf surface area they consume among multiple feeding event occurrences.

299 Whereas “damage type diversity” as discussed here is a measure of the richness of damage types, the  
300 evenness of herbivore damage also holds potential to inform differences in herbivory among assemblages.  
301 Gunkel and Wappler (2015) extended the insights of Olszewski (2004) regarding the relationship between  
302 rarefaction and evenness to the study of insect herbivory. A number of other authors have also quantified  
303 evenness—of the floral community, of damage types, or both—when evaluating insect herbivory in the fossil  
304 record (Wappler et al., 2015; Currano et al., 2019; Azevedo Schmidt et al., 2019). These too can be used  
305 as additional dimensions of the herbivory ecospace. Of note, the frequencies of each plant host and damage  
306 type can be replaced with their respective surface areas when calculating evenness metrics.

307 Another metric, related to evenness, is the offset between the prevalence of each plant host and the  
308 prevalence of insect damage on it. For example, if a locality contains two plant hosts, one that accounts for  
309 70% of total leaf surface area and another that accounts for 30%, a null expectation would be that 70% of  
310 herbivorized surface area would belong to the first plant host and 30% would belong to the second. The  
311 extent to which this null expectation is violated can be quantified by summing the absolute values of the  
312 differences between each plant host’s prevalence in the assemblage and the proportion of herbivorized leaf  
313 area that it contains. In this example, if the first host plant contains 65% of herbivorized leaf area and  
314 the second contains 35%, the offset between total and herbivorized leaf area summed across the locality is  
315  $|0.7 - 0.65| + |0.3 - 0.35| = 0.1$ . If, on the other hand, the first host plant contains only 25% of herbivorized  
316 leaf area and the second contains 75%, the offset between total and herbivorized leaf area summed across  
317 the locality is  $|0.7 - 0.25| + |0.3 - 0.75| = 0.9$ . This evenness-offset score ranges from 0 (no offset) to 2  
318 (maximum offset). This metric can be leveraged as an additional dimension for an herbivory ecospace. An  
319 84% confidence interval for this evenness-offset score can be generated by resampling plants and damage type  
320 occurrences, with replacement, to the amount of surface area observed in the original dataset, calculating  
321 an evenness-offset score for the resampled datasets, and iterating this process 5,000 times. (For discussion  
322 of the number of iterations needed, see the supplemental material.)

323 Floral diversity, and the relationship of floral diversity to damage type diversity, can comprise additional  
324 dimensions of the herbivory ecospace. A damage-diversity-to-floral-diversity ratio, in which rarefied damage  
325 type diversity is divided by rarefied floral diversity, holds the potential to reveal the extent to which floral  
326 diversity underlies damage type diversity. A confidence interval for this ratio can be calculated by randomly  
327 selecting a value within the confidence interval for rarefied damage type diversity, randomly selecting a value  
328 within the confidence interval for rarefied floral diversity, dividing the former by the latter, and iterating this  
329 process 1,000 times. The number of specimens required to rarefy floral diversity to sample coverage of 0.8  
330 may differ from the number of specimens required to rarefy damage type diversity to sample coverage of 0.8.

331 Lastly, the prevalences of each functional feeding group within an assemblage can comprise yet more

332 dimensions of the ecospace. Ideally, the prevalence of each functional feeding group would be quantified by  
333 the absolute and relative amounts of herbivorized surface area that it represents. However, as noted above,  
334 surface area measurements are unavailable for nearly all herbivory datasets. Thus, the proportion of damage  
335 type occurrences attributable to each functional feeding group can instead be used as a proxy. Confidence  
336 intervals for the proportions of either herbivorized area or damage type occurrences can be calculated by  
337 iteratively resampling with replacement as discussed above.

338 Additional measures, such as bipartite network metrics (*sensu* Blüthgen et al., 2008) and host specificity,  
339 require so much data that it may not be possible to precisely and accurately estimate them with a typical  
340 fossil herbivory dataset. This is further discussed in the supplemental material (Figure S6; “evaluation of  
341 other metrics”).

## 342 2.4 THE OPTIMAL NUMBER OF DIMENSIONS IN THE ECOSPACE

343 When traditional multivariate statistics are used in ecological studies, scree plots allow researchers to  
344 determine the number of axes that warrant interpretation (McGarigal et al., 2013). We are not aware of  
345 any analysis comparable to a scree plot that would facilitate determination of whether all of the above  
346 dimensions of an ecospace warrant consideration. However, we also do not see any *a priori* reason to  
347 expect that all of these dimensions will be informative in all studies of insect herbivory. We have listed all  
348 of these dimensions because they are already used in studies of insect herbivory and we aim to standardize  
349 statistical practices and to encourage use of the most robust metrics. It is entirely reasonable to assume at  
350 the beginning of any study that damage type diversity and the herbivory index are the only necessary  
351 dimensions of this ecospace unless another dimension can directly address any hypotheses under  
352 consideration. If two or more dimensions of an ecospace are highly colinear, or if one or more dimensions  
353 contribute only statistical noise, the most appropriate course of action is to eschew those dimensions.

## 354 3 THE AMOUNT OF SAMPLING REQUIRED

355 The ability to determine *a priori* how much sampling is needed for a given assemblage—or whether an  
356 assemblage contains sufficient material for robust comparisons with other assemblages—would allow  
357 investigators to allocate their efforts most efficiently. Unfortunately, our results show that neither the  
358 number of leaves nor the amount of surface area in an assemblage are reliable predictors of sufficient  
359 sampling for coverage-based rarefaction. The frequency of damage on leaves is a far more reliable predictor,  
360 but is much more difficult to estimate prior to data collection.

361 One advantage of coverage-based rarefaction is that it can be integrated with a “stopping rule”. In the case

362 of the sample coverage threshold of 0.8 used here, sample coverage can be re-calculated whenever new data  
363 are added to a dataset and sampling can be considered sufficient when the threshold of 0.8 has been reached.  
364 Although stoppage of data collection at this threshold would allow a maximum number of assemblages to be  
365 examined and compared, it is worth noting that the confidence intervals surrounding damage type diversity  
366 and the herbivory index will narrow if sampling continues beyond a sample coverage of 0.8.

367 As discussed in a recent contribution, estimates of damage type diversity require more sampling than  
368 estimates of the herbivory index do (Schachat et al., 2020). As shown in the supplemental material  
369 (“evaluation of other metrics”; Figure S6), even more sampling would be needed to estimate host-specificity  
370 of individual damage types and to estimate more complex metrics that match particular damage types  
371 with particular host plants; the extreme sensitivity of such metrics to sample size has already been  
372 established in the neontological literature (Blüthgen, 2010).

373 In fact, it has yet to be demonstrated that any realistic amount of sampling completeness in studies  
374 of fossil insect herbivory is adequate for reliable calculation of complex metrics such as bipartite network  
375 properties. The sampling completeness necessary for reliably calculating bipartite network properties could  
376 be established by iteratively subsampling an assemblage to half of its original leaf surface area and calculating  
377 network properties for each subsample. The results of this subsampling routine could be used to generate a  
378 confidence interval for each network property. If, for each network property, the confidence interval is narrow  
379 enough that it does not overlap with the confidence intervals generated for other assemblages subsampled  
380 to the same amount of surface area, the amount of surface area available is sufficient to reliably calculate  
381 network properties. Of note, however, the requisite amount of surface area will vary with the dominance–  
382 diversity structure of the plant host and damage type communities at each assemblage. It is not yet clear  
383 whether it is worth pursuing sufficient sampling for the implementation of bipartite network analyses.

## 384 4 GENERATION OF NULL HYPOTHESES

385 The study of insect herbivory in the fossil record has become vastly more popular over the past few decades.  
386 Early studies that examined patterns of insect herbivory caused by a major event, such as a mass extinction,  
387 had only one available option: to quantify the magnitude of the differences in insect herbivory before and  
388 after the event in question. A question that could not be addressed at the time those early studies were  
389 conducted, but can be addressed now, is whether the amount of change in insect herbivory after a major  
390 event exceeds the amount of change that one would expect if the event had not happened.

391 Returning to the end-Triassic example mentioned in the Introduction, a number of factors preclude the  
392 attribution of changes in herbivory across a boundary to the events that occurred at the boundary. First, the

393 difficulty of finding floral assemblages deposited immediately before or after the Triassic/Jurassic boundary,  
394 and establishing their proximity to the boundary, necessitates that this event be examined with Triassic and  
395 Jurassic floras that are separated by millions of years—a long enough time for plant and insect communities  
396 to change without any extraordinary abiotic events. Second, even within a single basin, plant communities,  
397 soils, precipitation, temperature, and perhaps also predators and parasitoids change with major abiotic  
398 events, introducing various potential causes of changes in insect herbivory that may not be directly related  
399 to the abiotic event in question (Currano et al., 2019). On a related note, although nutrient dilution is  
400 expected to cause an increase in the herbivory index, several of these alternative phenomena could also cause  
401 such an increase. Third, extant ecosystems demonstrate that coeval plant communities in close geographic  
402 proximity can vary tremendously due to microclimate and other factors such as soil type and frequency of  
403 disturbance (Tamme et al., 2010); the difficulty of identifying a characteristic flora for a particular place and  
404 time makes it more difficult still to compare characteristic patterns of insect herbivory for a particular place  
405 across different time slices.

406 To overcome these obstacles, many studies of insect herbivory have examined multiple plant assemblages  
407 from each time interval of interest (Labandeira et al., 2002a; Currano et al., 2008; Wappler, 2010; Donovan  
408 et al., 2018). If the assemblages from each time interval form distinct clusters, in an NMDS plot for example,  
409 this provides far stronger evidence of change over time than can be gleaned from only two assemblages. The  
410 outstanding question is how much change over time is to be expected in the absence of an event such as  
411 an environmental disturbance (the amount of change expected as a null hypothesis), and how much change  
412 can be attributed to the event under consideration (the amount of change needed to support the alternative  
413 hypothesis that the event in question caused significantly more change in patterns of insect herbivory than  
414 can be explained only by the passage of time).

415 The theoretical ecospace outlined here holds the potential to go beyond an examination of the number of  
416 damage types observed per number of leaves, by quantifying the following. First is the amount of variation  
417 in insect herbivory to be expected among coeval floras that occur in close proximity and have slightly  
418 different plants, soils, depositional conditions, and microclimates. Second is the amount of variation in  
419 insect herbivory to be expected on the time scales examined in relevant studies (10 Kyr, 100 Kyr, 1 Myr,  
420 10 Myr) in the absence of any major environmental changes. Third is the amount of, and the nature of,  
421 changes in insect herbivory associated with environmental changes, such as the Cretaceous/Paleogene Event  
422 (Labandeira et al., 2002b; Donovan et al., 2018) and the Paleocene/Eocene Thermal Maximum (Currano  
423 et al., 2008). Fourth is the amount of, and the nature of, changes in insect herbivory associated with insect  
424 evolution over tens of millions of years. Nearly any comparison of floral assemblages will yield evidence  
425 of different patterns of insect herbivory; the key question is how much change needs to occur in order to



426 rise above background levels. In the future, as data become available to include increasing numbers of  
427 assemblages in this theoretical ecospace, confidence intervals can be established in each dimension for these  
428 four types of changes in insect herbivory.

429 Traditional morphospaces have already been leveraged to generate null hypotheses and to disentangle  
430 the results of directional evolution from changes through time that are best attributed to a “random walk”  
431 model (Pie and Weitz, 2005; Puttick et al., 2020). The same logic can be extended to the study of insect  
432 herbivory in the fossil record.

## 433 5 PRELIMINARY RESULTS

### 434 5.1 COMPARABLE HERBIVORY DURING THE PALEOZOIC, MESOZOIC, AND 435 CENOZOIC

436 When damage type diversity from the assemblages in Tables 1, 2, and 3 is plotted against time, the most  
437 striking result is the overlap of damage type diversity among Permian, Triassic, and angiosperm-dominated  
438 assemblages (Figure 5). The dataset analyzed here contains five times as many angiosperm-dominated  
439 assemblages as it does Paleozoic assemblages, and over three times as many angiosperm-dominated  
440 assemblages as Triassic assemblages. And yet the Laguna Polina assemblage from the Permian of  
441 Patagonia (Cariglino, 2018), the Kühwiesenkopf assemblage from the Triassic of Italy (Labandeira et al.,  
442 2016), and Cyphergat 111A assemblage from the Triassic of South Africa (Labandeira et al., 2018) all  
443 contain damage type diversities within the highest 12% of values for angiosperm-dominated assemblages.  
444 The supplemental material includes a sensitivity analysis and a discussion of the role of rare damage types  
445 in diversity estimates.

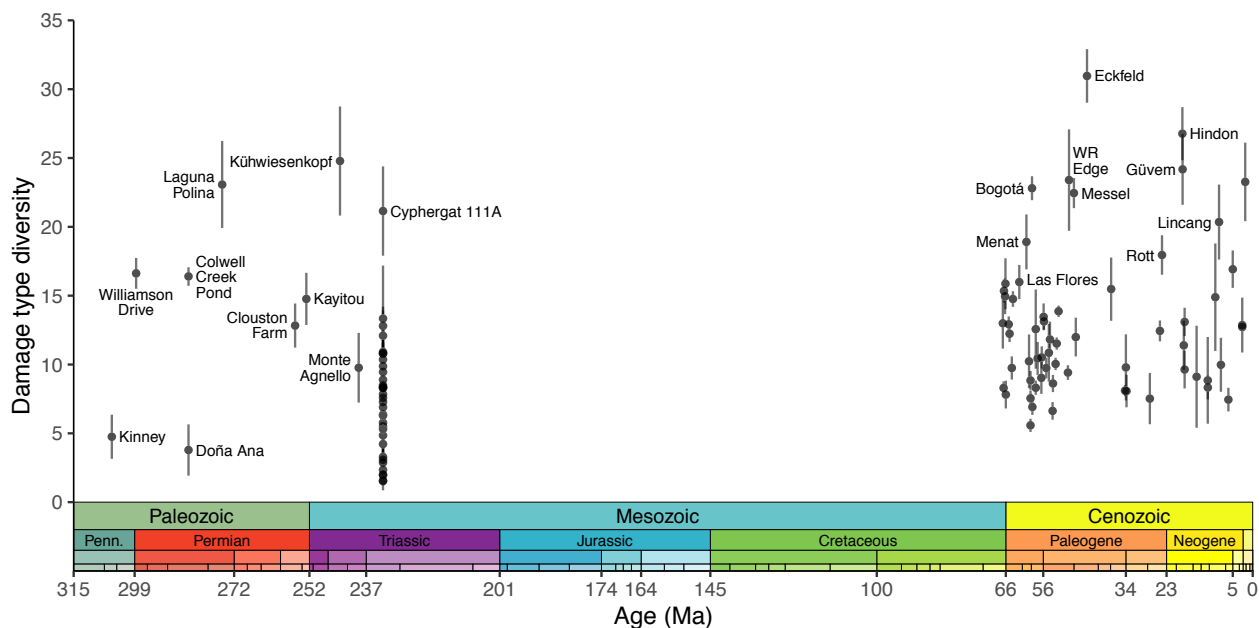

Figure 5: Damage type diversity estimated with coverage-based rarefaction, plotted against time.

446 The minimal increase in the upper bound of damage type diversity from the Paleozoic through Cenozoic  
 447 is further supported by the two-dimensional ecospace which we advocate for here (Figure 6). The available  
 448 data are sufficient to include only eight assemblages in this ecospace: Williamson Drive (Xu et al., 2018)  
 449 and Colwell Creek Pond (Schachat et al., 2015) from the late Paleozoic; and Daiye Spa, Hubble Bubble,  
 450 PN, Fifteenmile Creek, Republic, and Bonanza from the interval surrounding the Paleocene/Eocene Thermal  
 451 Maximum (Wilf et al., 2001; Labandeira, 2002; Currano et al., 2008, 2010, 2016). This ecospace also supports  
 452 the prediction outlined earlier in this contribution that an abiotic event—in this case, exemplified by the  
 453 Hubble Bubble locality during the PETM—can indeed lead to a change in damage type diversity, but most  
 454 clearly manifests with a change in the herbivory index.

455 This finding of similar damage type diversities in Paleozoic, Triassic, and angiosperm-dominated  
 456 assemblages may be somewhat surprising given the angiosperm potential for uniquely high productivity  
 457 (Boyce and Zwieniecki, 2012) and their tremendous diversity (Soltis and Soltis, 2004)—and especially their  
 458 codiversification with insects (Pellmyr, 1992). Leaf mining, for example, is a highly specialized form of  
 459 herbivory that accounts for a wide array of described damage types (Eiseman, 2019) and occurs  
 460 overwhelmingly on angiosperm leaves (Scott et al., 1992). One might expect the origin of angiosperms to  
 461 have caused a diversification of leaf-mining insects, which in turn would have caused an increase in damage  
 462 type diversity. However, the data do not support an overall increase in damage type diversity in  
 463 angiosperm-dominated assemblages.

464 The difficulty of quantifying the role of angiosperm diversity and biomass in shaping extant ecosystems

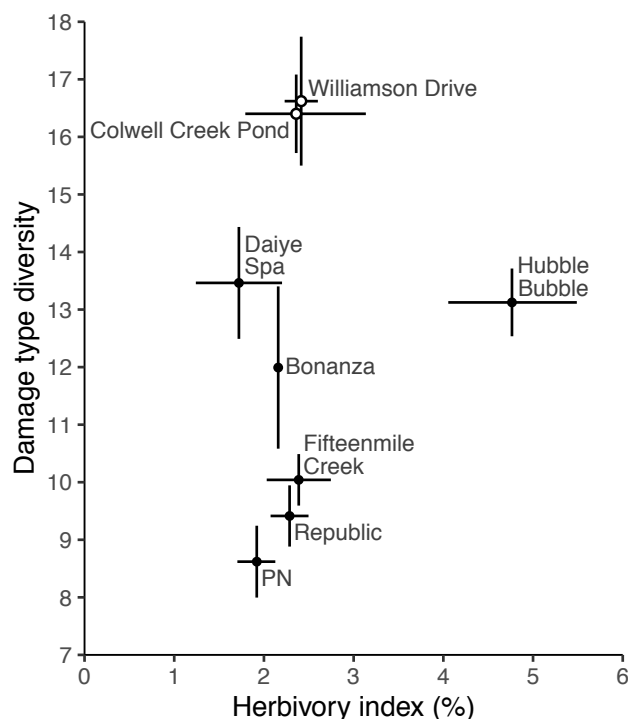

Figure 6: Damage type diversity plotted against the herbivory index in a two-dimensional ecospace. Paleozoic localities are denoted with white circles and angiosperm localities are denoted with dark circles. The confidence intervals for the herbivory index were derived with the method of [Schachat et al. \(2018\)](#) for Williamson Drive and Colwell Creek Pond, and with the method of [Currano et al. \(2016\)](#) for all other assemblages.

465 stems largely from their overwhelming dominance. If angiosperms accounted for 70% of the diversity and  
466 biomass of land plants, any disproportionate ecological role they may fulfill—for example, if they hosted  
467 95% of leaf mine damage types—would be easier to establish. But, because angiosperms account for  
468 approximately 96% of described vascular plant species ([Christenhusz and Byng, 2016](#)), any  
469 disproportionate ecological role they may fulfill—for example, if they hosted 98% of leaf mine damage  
470 types—may be statistically indistinguishable from the null expectation of this ecological role (in the case of  
471 this example, that angiosperms would host 96% of leaf mine damage types). To use another hypothetical  
472 example, if it were known with absolute certainty that angiosperms host only 93% of leaf mine damage  
473 types, one could still say that the overwhelming majority of leaf mine damage types occur on angiosperms,  
474 such that leaf mine diversity and thus overall damage type diversity likely increased alongside the radiation  
475 of flowering plants.

## 5.2 THE ROLE OF $p\text{CO}_2$ DEPENDS ON THE RATE OF ATMOSPHERIC CHANGE

The changes in damage type diversity in Figure 5 show no general relationship with  $p\text{CO}_2$ . For example, the Kayitou assemblage dates to the late Lopingian, an interval for which many geochemical models reconstruct high  $p\text{CO}_2$  (Mills et al., 2019), but Kayitou does not have particularly prevalent insect damage (Liu et al., 2020) nor is its damage type diversity unusually high (Figure 5).

Rising  $p\text{CO}_2$  may drive nutrient dilution and, thus, increased insect herbivory, but stable  $p\text{CO}_2$ —whether high or low—may favor instead compensatory physiological changes that allow for stable rates of carbon fixation under different atmospheres. The carbon cycle perturbation of the PETM may have constituted an atmospheric change too rapid for plants to adapt to; it is under this circumstance that nutrient dilution may be most likely to occur. For this reason, the increased intensity of herbivory seen at the PETM is not a template for the changes in herbivory that would occur if  $p\text{CO}_2$  rose slowly enough for plants to remain well adapted to the atmospheric composition.

## 6 CONSIDERATIONS FOR FUTURE STUDIES

Overlapping damage type diversities through time are far easier to demonstrate than changing diversities. Labandeira et al. (2002b) evaluated damage type diversity before and after the end-Cretaceous event. Their study included 17 beds with 200 or more dicot leaves: eleven Cretaceous and six Paleogene. Coverage-based rarefaction supports the authors' conclusion that damage type diversity was higher during the latest Cretaceous than during the earliest Paleogene. However, damage type diversities vary widely within each of these two intervals. These fossil beds all occur within the same basin, and the beds from each interval are dominated by a single type of depositional environment. Aside from the first-order finding of less herbivory in Paleogene beds, variation in damage type diversity does not occur in a predictable manner through time.

This variability observed within 1 Myr in a single basin highlights the difficulty of establishing a representative amount of damage type diversity for a particular interval—even for a single depositional environment within a single basin during a very small amount of geologic time. The low signal-to-noise ratio among the damage type diversities for a pooled set of assemblages highlights the difficulty of identifying temporal trends in insect herbivory.

Additional factors further conceal temporal trends. First is the obvious variability among assemblages in geographic location, insect taxa, plant taxa, soil type, and climate. Second is uneven sampling across time. No studies of herbivory for an entire flora have been published for the Jurassic, and within the Cenozoic, the Paleogene is far better sampled than the Neogene or Quaternary. Third, especially for the

506 Cenozoic, assemblages are chosen for study based largely on their relevance to events such as the end-  
507 Cretaceous extinction (Labandeira et al., 2002b; Wilf et al., 2006; Wappler et al., 2009; Donovan et al., 2017,  
508 2018), the Paleocene/Eocene Thermal Maximum (Wilf and Labandeira, 1999; Wilf et al., 2001; Currano  
509 et al., 2008; Currano, 2009; Currano et al., 2010), and the Early Eocene Climatic Optimum (Currano et al.,  
510 2016, 2019). The assemblages for which we have data are disproportionately likely to come from the least  
511 representative part of a geologic interval, such as the very earliest Eocene, because these time slices epitomize  
512 the phenomena that underlie paleontologically interesting ecological and evolutionary questions. The uneven  
513 temporal distribution of studied assemblages adds far more variability to reconstructed long-term trends  
514 than one would expect if assemblages were chosen for study in an unbiased manner, and has the potential  
515 to obscure these trends.

## 516 7 CONCLUSIONS

517 As the proliferation of free software packages and online databases continues, it becomes easier to run analyses  
518 and generate graphs with insect herbivory data—regardless of whether the methods are appropriate for the  
519 data and regardless of whether the datasets are sufficiently complete to meet the assumptions of the methods.  
520 As shown here, the Chao1 estimator, a method that is particularly well-suited to handle the sparseness of  
521 insect herbivory datasets, rarely provides estimates of damage type diversity that are both precise enough to  
522 minimize the frequency of false negative results and accurate enough to contain the true, asymptotic value.  
523 Moreover, asymptotic damage type diversity calculated through a combination of rarefaction and the  
524 Chao1 estimator is formulated as an unbiased estimator but is severely biased by sample size, presumably  
525 due to the exceptional sparsity of herbivory datasets. This finding highlights the need to regress estimators  
526 of insect herbivory against the number of leaves and damage types in raw datasets to verify that they are  
527 not biased by sampling effort.

528 Whereas size-based rarefaction and the Chao1 estimator present insurmountable limitations for insect  
529 herbivory data, coverage-based rarefaction holds the most promise for generating estimates of damage type  
530 diversity that are unbiased, and robust to leaf size and sample size. Combined with the herbivory index,  
531 which measures the intensity of insect herbivory, estimates of damage type diversity can be leveraged as the  
532 foundation of a theoretical ecospace. This ecospace holds the potential to address two overarching questions  
533 that remained unresolved for two decades. First is how to distinguish the minor variation in insect herbivory  
534 that inevitably occurs among assemblages from slightly different times or places (null hypothesized amount of  
535 variation) from the changes in insect herbivory that accompany major abiotic events or innovations in insect  
536 evolution (alternative hypothesis). Second is how to distinguish among abiotic causes (e.g., mass extinctions)

537 and biotic causes (insect and plant evolution) of major changes in the amount of insect herbivory.

538 There are two ways to build upon the many fossil herbivory datasets amassed over the past few  
539 decades: collecting more data, and interrogating existing data to develop and refine analytical frameworks.  
540 By advancing the latter, a theoretical ecospace for insect herbivory will hopefully underscore the  
541 importance the former.

## 542 8 ACKNOWLEDGEMENTS

543 This contribution was made possible by the many paleontologists who have collected fossil plants and  
544 described the insect damage they contain, with John Anderson and Heidi Holmes particularly deserving of  
545 recognition here. Bárbara Cariglino, Mónica R. Carvalho, Michael P. Donovan, L. Alejandro Giraldo,  
546 Christian Müller, Manuel Robledo, Torsten Wappler, and Peter Wilf provided access to datasets. The  
547 Paleobotany Reading Group at Stanford University provided valuable discussion. We thank two  
548 anonymous reviewers for their very helpful feedback. S.R.S. received funding from the Coleman F. Fung  
549 Interdisciplinary Graduate Fellowship, Vice Provost of Graduate Education, Stanford University; from the  
550 Harriet Benson Fellowship Award, Department of Geological Sciences, Stanford University; and from the  
551 Winifred Goldring Award, Association of Women Geoscientists and Paleontological Society.

| Assemblage                     | Leaves | DTs | Period   | Age     | Citation                                 |
|--------------------------------|--------|-----|----------|---------|------------------------------------------|
| Birds River 111                | 7,106  | 35  | Triassic | Carnian | <a href="#">Labandeira et al. (2018)</a> |
| Greenvale 121                  | 2,749  | 12  | Triassic | Carnian | <a href="#">Labandeira et al. (2018)</a> |
| Boesmanskhoek 112              | 1,058  | 2   | Triassic | Carnian | <a href="#">Labandeira et al. (2018)</a> |
| Cyphergat 111A                 | 5,499  | 26  | Triassic | Carnian | <a href="#">Labandeira et al. (2018)</a> |
| Kannaskop 111                  | 2,114  | 11  | Triassic | Carnian | <a href="#">Labandeira et al. (2018)</a> |
| Telemachus Spruit 111          | 5,860  | 14  | Triassic | Carnian | <a href="#">Labandeira et al. (2018)</a> |
| Kommandantskop 111             | 1,096  | 8   | Triassic | Carnian | <a href="#">Labandeira et al. (2018)</a> |
| Vineyard 111                   | 2,146  | 10  | Triassic | Carnian | <a href="#">Labandeira et al. (2018)</a> |
| Elandspruit 111                | 1,054  | 10  | Triassic | Carnian | <a href="#">Labandeira et al. (2018)</a> |
| Kraai River 311                | 1,213  | 6   | Triassic | Carnian | <a href="#">Labandeira et al. (2018)</a> |
| Kraai River 111 <sup>a</sup>   | 1,780  | 8   | Triassic | Carnian | <a href="#">Labandeira et al. (2018)</a> |
| Lutherskop 311                 | 5,180  | 22  | Triassic | Carnian | <a href="#">Labandeira et al. (2018)</a> |
| Waldeck 111                    | 1,322  | 11  | Triassic | Carnian | <a href="#">Labandeira et al. (2018)</a> |
| Konings Kroon 222 <sup>a</sup> | 1,679  | 13  | Triassic | Carnian | <a href="#">Labandeira et al. (2018)</a> |
| Konings Kroon 111A             | 1,073  | 5   | Triassic | Carnian | <a href="#">Labandeira et al. (2018)</a> |
| Peninsula 321                  | 1,311  | 4   | Triassic | Carnian | <a href="#">Labandeira et al. (2018)</a> |
| Peninsula 311                  | 1,665  | 12  | Triassic | Carnian | <a href="#">Labandeira et al. (2018)</a> |
| Peninsula 411                  | 6,254  | 17  | Triassic | Carnian | <a href="#">Labandeira et al. (2018)</a> |
| Klein Hoek 111B                | 1,004  | 9   | Triassic | Carnian | <a href="#">Labandeira et al. (2018)</a> |
| Klein Hoek 111C                | 2,644  | 17  | Triassic | Carnian | <a href="#">Labandeira et al. (2018)</a> |
| Kappokraal 111                 | 1,453  | 27  | Triassic | Carnian | <a href="#">Labandeira et al. (2018)</a> |
| Elandspruit 112A               | 1,131  | 5   | Triassic | Carnian | <a href="#">Labandeira et al. (2018)</a> |
| Nuwejaarspruit 111B            | 1,582  | 18  | Triassic | Carnian | <a href="#">Labandeira et al. (2018)</a> |
| Winnaarspruit 111              | 1,396  | 16  | Triassic | Carnian | <a href="#">Labandeira et al. (2018)</a> |
| Morija 111B                    | 1,235  | 7   | Triassic | Carnian | <a href="#">Labandeira et al. (2018)</a> |
| Makoaneng 111                  | 1,206  | 6   | Triassic | Carnian | <a href="#">Labandeira et al. (2018)</a> |
| Hlatimbe Valley 213            | 1,526  | 16  | Triassic | Carnian | <a href="#">Labandeira et al. (2018)</a> |
| Umkomaas 111                   | 9,828  | 36  | Triassic | Carnian | <a href="#">Labandeira et al. (2018)</a> |
| Sani Pass 111                  | 1,236  | 9   | Triassic | Carnian | <a href="#">Labandeira et al. (2018)</a> |
| Qachasnek 111 <sup>a</sup>     | 2,093  | 7   | Triassic | Carnian | <a href="#">Labandeira et al. (2018)</a> |
| Matatiele 111                  | 3,667  | 23  | Triassic | Carnian | <a href="#">Labandeira et al. (2018)</a> |
| Golden Gate 111                | 1,208  | 16  | Triassic | Carnian | <a href="#">Labandeira et al. (2018)</a> |
| Little Switzerland 111         | 8,218  | 28  | Triassic | Carnian | <a href="#">Labandeira et al. (2018)</a> |
| Aasvoëlberg 111                | 2,941  | 11  | Triassic | Carnian | <a href="#">Labandeira et al. (2018)</a> |
| Aasvoëlberg 211                | 1,942  | 12  | Triassic | Carnian | <a href="#">Labandeira et al. (2018)</a> |
| Aasvoëlberg 311                | 10,809 | 18  | Triassic | Carnian | <a href="#">Labandeira et al. (2018)</a> |
| Aasvoëlberg 411                | 12,398 | 39  | Triassic | Carnian | <a href="#">Labandeira et al. (2018)</a> |

Table 1: The assemblages with over 1,000 broadleaf specimens from [Labandeira et al. \(2018\)](#), collected from the Molteno formation by [Anderson and Anderson \(1983, 1985, 1989, 2003, 2008, 2017\)](#), that were analyzed in this study. <sup>a</sup>These assemblages do not have sufficient sample coverage to be rarefied to a coverage of 0.8.

| <b>Assemblage</b>          | <b>Leaves</b> | <b>DTs</b> | <b>Period</b> | <b>Age</b>    | <b>Citation</b>                             |
|----------------------------|---------------|------------|---------------|---------------|---------------------------------------------|
| Willershausen              | 7,932         | 85         | Neogene       | Piacenzian    | <a href="#">Adroit et al. (2018)</a>        |
| Lincang <sup>a</sup>       | 1,103         | 36         | Neogene       | ?Tort.–Mess.  | <a href="#">Zhang et al. (2018)</a>         |
| Tröllatunga-Gautshamar     | 1,069         | 17         | Neogene       | Tortonian     | <a href="#">Wappler and Grímsson (2016)</a> |
| Brjónslækur-Selja          | 1,613         | 29         | Neogene       | Serravallian  | <a href="#">Wappler and Grímsson (2016)</a> |
| Bílina–DSH                 | 2,233         | 54         | Neogene       | Burdigalian   | <a href="#">Knor et al. (2012)</a>          |
| Břešťany–LCH               | 1,181         | 28         | Neogene       | Burdigalian   | <a href="#">Knor et al. (2012)</a>          |
| Rott                       | 2,474         | 55         | Paleogene     | Chattian      | <a href="#">Wappler (2010)</a>              |
| Enspel                     | 1,622         | 39         | Paleogene     | Chattian      | <a href="#">Gunkel and Wappler (2015)</a>   |
| MK-3                       | 2,428         | 41         | Paleogene     | Priabonian    | <a href="#">Deng et al. (2020)</a>          |
| Luckenau Clay Complex      | 1,455         | 27         | Paleogene     | Bart.–Pria.   | <a href="#">Müller et al. (2017)</a>        |
| Eckfeld maar               | 6,748         | 78         | Paleogene     | Lutetian      | <a href="#">Wappler et al. (2012)</a>       |
| Messel maar                | 9,334         | 73         | Paleogene     | Ypres.–Lutet. | <a href="#">Wappler et al. (2012)</a>       |
| Republic                   | 1,019         | 34         | Paleogene     | Ypresian      | <a href="#">Labandeira (2002)</a>           |
| Laguna del Hunco           | 3,599         | 56         | Paleogene     | Ypresian      | <a href="#">Wilf et al. (2005)</a>          |
| Wind River Interior        | 1,755         | 40         | Paleogene     | Ypresian      | <a href="#">Currano et al. (2019)</a>       |
| Fifteenmile Creek          | 1,822         | 49         | Paleogene     | Ypresian      | <a href="#">Currano et al. (2010)</a>       |
| South Fork of Elk Creek    | 1,008         | 53         | Paleogene     | Ypresian      | <a href="#">Currano et al. (2008)</a>       |
| Dead Platypus              | 1,016         | 28         | Paleogene     | Thanetian     | <a href="#">Currano et al. (2010)</a>       |
| Lur'd Leaves               | 1,364         | 28         | Paleogene     | Thanetian     | <a href="#">Wilf et al. (2006)</a>          |
| Kevin's Jerky              | 1,423         | 25         | Paleogene     | Selandian     | <a href="#">Wilf et al. (2006)</a>          |
| Palacio de los Loros 2     | 1,137         | 50         | Paleogene     | Danian        | <a href="#">Donovan et al. (2018)</a>       |
| Castle Rock                | 2,668         | 25         | Paleogene     | Danian        | <a href="#">Wilf et al. (2006)</a>          |
| Mexican Hat                | 2,220         | 34         | Paleogene     | Danian        | <a href="#">Donovan et al. (2014)</a>       |
| Palacio de los Loros 1     | 1,089         | 41         | Paleogene     | Danian        | <a href="#">Donovan et al. (2018)</a>       |
| Somebody's Garden          | 1,528         | 32         | Cretaceous    | Maastrichtian | <a href="#">Labandeira et al. (2002b)</a>   |
| Kühwiesenkopf              | 1,075         | 36         | Triassic      | Anisian       | <a href="#">Labandeira et al. (2016)</a>    |
| Kayitou                    | 1,043         | 23         | Permian       | Changhsingian | <a href="#">Liu et al. (2020)</a>           |
| Bletterbach <sup>a,b</sup> | 1,193         | 14         | Permian       | Wuch.–Chan.   | <a href="#">Bernardi et al. (2017)</a>      |
| Clouston Farm              | 8,714         | 22         | Permian       | Wuch.–Chan.   | <a href="#">Prevec et al. (2009)</a>        |
| Laguna Polina              | 1,531         | 37         | Permian       | ?             | <a href="#">Cariglino (2018)</a>            |
| Wuda <sup>a,b</sup>        | ~10,000       | 21         | Permian       | Asselian      | <a href="#">Feng et al. (2020)</a>          |
| Williamson Drive           | 1,830         | 39         | Permian       | Asselian      | <a href="#">Xu et al. (2018)</a>            |
| Kinney                     | 1,992         | 9          | Pennsylvanian | Kasimovian    | <a href="#">Donovan and Lucas (2021)</a>    |

Table 2: The published assemblages with over 1,000 broadleaf specimens from sources other than [Labandeira et al. \(2018\)](#) that were analyzed in this study. <sup>a</sup>These assemblages are not included in the sensitivity analysis presented in Figure S2 because damage type data are not available for each individual specimen. <sup>b</sup>These assemblages do not have sufficient sample coverage to be rarefied to a coverage of 0.8.



| Assemblage                     | Leaves | DTs | Period        | Age           | Citation                         |
|--------------------------------|--------|-----|---------------|---------------|----------------------------------|
| Bernasso                       | 535    | 40  | Quaternary    | Gelasian      | Adroit et al. (2018)             |
| Berga                          | 534    | 25  | Neogene       | Piacenzian    | Adroit et al. (2018)             |
| Palo Pintado                   | 856    | 34  | Neogene       | Mess.–Zanc.   | Robledo et al. (2018)            |
| Hreðavatn-Staffholt            | 678    | 23  | Neogene       | Messinian     | Wappler and Grímsson (2016)      |
| Skarðsströnd-Mókollsdalur      | 524    | 21  | Neogene       | Tortonian     | Wappler and Grímsson (2016)      |
| San José                       | 384    | 9   | Neogene       | Serravallian  | Robledo et al. (2018)            |
| Selárdalur-Botn                | 256    | 10  | Neogene       | Langhian      | Wappler and Grímsson (2016)      |
| Punta Basílica                 | 209    | 26  | Neogene       | Aqui.–Lang.   | Gandolfo and Zamalao (2021)      |
| Güvem                          | 624    | 45  | Neogene       | Burdigalian   | Adroit et al. (2021)             |
| Hindon Maar                    | 466    | 78  | Neogene       | Burdigalian   | Möller et al. (2017)             |
| Quegstein                      | 404    | 13  | Paleogene     | Rupel.–Chat.  | Wappler (2010)                   |
| MK-1                           | 599    | 20  | Paleogene     | Rupelian      | Deng et al. (2020)               |
| Renardodden                    | 413    | 18  | Paleogene     | Pria.–Rupel.  | Wappler and Denk (2011)          |
| Bonanza                        | 894    | 26  | Paleogene     | Lutetian      | Wilf and Labandeira (1999)       |
| Wind River Edge                | 908    | 33  | Paleogene     | Ypresian      | Currano et al. (2019)            |
| PN                             | 693    | 28  | Paleogene     | Ypresian      | Currano et al. (2010)            |
| Sourdough                      | 792    | 23  | Paleogene     | Ypresian      | Wilf et al. (2001)               |
| Cool Period                    | 491    | 25  | Paleogene     | Ypresian      | Currano et al. (2010)            |
| Level E                        | 336    | 19  | Paleogene     | Ypresian      | Azevedo Schmidt et al. (2019)    |
| Hubble Bubble                  | 994    | 39  | Paleogene     | Than./Ypres.  | Currano et al. (2008)            |
| Daiye Spa                      | 843    | 33  | Paleogene     | Thanetian     | Currano et al. (2008)            |
| Clarkforkian                   | 749    | 27  | Paleogene     | Thanetian     | Wilf et al. (2001)               |
| Cerrejón                       | 507    | 28  | Paleogene     | Thanetian     | Wing et al. (2009)               |
| Level C                        | 311    | 21  | Paleogene     | Thanetian     | Azevedo Schmidt et al. (2019)    |
| Skeleton Coast                 | 840    | 21  | Paleogene     | Thanetian     | Wilf et al. (2006)               |
| Bogotá                         | 955    | 90  | Paleogene     | Sela.–Than.   | Giraldo et al. (2021)            |
| Kolfjellet                     | 357    | 18  | Paleogene     | Sela.–Than.   | Wappler and Denk (2011)          |
| Haz-Mat                        | 757    | 18  | Paleogene     | Selandian     | Wilf et al. (2006)               |
| <i>Persites</i> Paradise       | 963    | 22  | Paleogene     | Selandian     | Wilf et al. (2006)               |
| Menat                          | 938    | 39  | Paleogene     | Selandian     | Wappler et al. (2009)            |
| Las Flores                     | 568    | 42  | Paleogene     | Danian        | Donovan et al. (2018)            |
| Pyramid Butte                  | 655    | 17  | Paleogene     | Danian        | Labandeira et al. (2002b)        |
| Battleship                     | 461    | 31  | Cretaceous    | Maastrichtian | Labandeira et al. (2002b)        |
| Dean Street                    | 709    | 32  | Cretaceous    | Maastrichtian | Labandeira et al. (2002b)        |
| Lefipán East                   | 607    | 45  | Cretaceous    | Maastrichtian | Donovan et al. (2018)            |
| Luten's 4H Hadrosaur           | 426    | 26  | Cretaceous    | Maastrichtian | Labandeira et al. (2002b)        |
| Camarena <sup>a</sup>          | 428    | 11  | Jurassic      | Aalenian      | Santos et al. (2021)             |
| Monte Agnello                  | 646    | 19  | Triassic      | Ladinian      | Labandeira et al. (2016)         |
| Dos Hermanos <sup>a</sup>      | 359    | 16  | Permian       | Wuch.–Chan.   | Cariglino (2018)                 |
| South Ash Pasture <sup>a</sup> | 505    | 22  | Permian       | Road.–Capit.  | Maccracken and Labandeira (2020) |
| Doña Ana Mts.                  | 215    | 4   | Permian       | Artinskian    | DiMichele et al. (2018)          |
| Colwell Creek Pond             | 991    | 46  | Permian       | Artinskian    | Schachat et al. (2014)           |
| Laguna Lillo <sup>a</sup>      | 232    | 7   | Permian       | Assel.–Kung.  | Cariglino (2018)                 |
| Beeman <sup>a</sup>            | 392    | 7   | Pennsylvanian | Kasim.–Gzhel. | Lucas et al. (2021)              |

Table 3: The assemblages analyzed in this study with 200–1,000 broadleaf specimens. <sup>a</sup>These assemblages do not have sufficient sample coverage to be rarefied to a coverage of 0.8.

## REFERENCES

- 552
- 553 Ackerly, D., Knight, C., Weiss, S., Barton, K., and Starmer, K. (2002). Leaf size, specific leaf area and  
554 microhabitat distribution of chaparral woody plants: Contrasting patterns in species level and community  
555 level analyses. *Oecologia*, 130(3):449–457.
- 556 Adams, J. M., Ahn, S., Ainuddin, N., and Lee, M.-L. (2011). A further test of a palaeoecological thermometer:  
557 Tropical rainforests have more herbivore damage diversity than temperate forests. *Review of Palaeobotany  
558 and Palynology*, 164:60–66.
- 559 Adams, J. M., Brusa Anthony, A., Soyeong Ahn, A., and Ainuddin, A. N. (2010). Present-day testing of  
560 a paleoecological pattern: Is there really a latitudinal difference in leaf-feeding insect-damage diversity?  
561 *Review of Palaeobotany and Palynology*, 162(1):63–70.
- 562 Adams, J. M. and Zhang, Y. (2009). Is there more insect folivory in warmer temperate climates? A latitudinal  
563 comparison of insect folivory in eastern North America. *Journal of Ecology*, 97(5):933–940.
- 564 Adams, J. M., Zhang, Y., Basri, M., and Shukor, N. (2009). Do tropical forest leaves suffer more insect  
565 herbivory? A comparison of tropical versus temperate herbivory, estimated from leaf litter. *Ecological  
566 Research*, 24(6):1381–1392.
- 567 Adroit, B., Girard, V., Kunzmann, L., Terral, J.-F., and Wappler, T. (2018). Plant–insect interactions  
568 patterns in three European paleoforests of the late-Neogene—early-Quaternary. *PeerJ*, 6:e5075.
- 569 Adroit, B., Teodoridis, V., Güner, T. H., and Denk, T. (2021). Patterns of insect damage types reflect  
570 complex environmental signal in Miocene forest biomes of Central Europe and the Mediterranean. *Global  
571 and Planetary Change*, 199:103451.
- 572 Anderson, H. M. and Anderson, J. M. (2008). Molteno Ferns: Late Triassic Biodiversity in Southern Africa.  
573 *Strelitzia*, 21:1–258.
- 574 Anderson, H. M. and Anderson, J. M. (2017). Molteno sphenophytes: Late Triassic biodiversity in southern  
575 Africa. *Evolutionary Studies Institute Monograph Series*, 1:1–191, pls 1–180.
- 576 Anderson, J. M. and Anderson, H. M. (1983). *Palaeoflora of Southern Africa: Molteno Formation (Triassic):  
577 Volume 1: Part 1. Introduction Part 2. Dicroidium*. Balkema, Rotterdam.
- 578 Anderson, J. M. and Anderson, H. M. (1985). *Palaeoflora of Southern Africa: Prodrum of South African  
579 Megaflores, Devonian to Lower Cretaceous*. Balkema, Rotterdam.

- 580 Anderson, J. M. and Anderson, H. M. (1989). *Palaeoflora of Southern Africa: Molteno Formation (Triassic):*  
581 *Volume 2: Gymnosperms (Excluding Dicroidium)*. Balkema, Rotterdam.
- 582 Anderson, J. M. and Anderson, H. M. (2003). Heyday of the gymnosperms: Systematics and biodiversity of  
583 the Late Triassic Molteno fructifications. *Strelitzia*, 15:1–398.
- 584 Andrew, N. R. and Hughes, L. (2005). Herbivore damage along a latitudinal gradient: Relative impacts of  
585 different feeding guilds. *Oikos*, 108(1):176–182.
- 586 Anstett, D. N., Naujokaitis-Lewis, I., and Johnson, M. T. J. (2014). Latitudinal gradients in herbivory on  
587 *Oenothera biennis* vary according to herbivore guild and specialization. *Ecology*, 95(10):2915–2923.
- 588 Azevedo Schmidt, L. E., Dunn, R. E., Mercer, J., Dechesne, M., and Currano, E. D. (2019). Plant and insect  
589 herbivore community variation across the Paleocene–Eocene boundary in the Hanna Basin, southeastern  
590 Wyoming. *PeerJ*, 7:e7798.
- 591 Balisi, M. A. and Van Valkenburgh, B. (2020). Iterative evolution of large-bodied hypercarnivory in canids  
592 benefits species but not clades. *Communications Biology*, 3(1):1–9.
- 593 Bambach, R. K. (1983). Ecospace utilization and guilds in marine communities through the Phanerozoic. In  
594 Stehli, F. G., Tevesz, M. J. S., and McCall, P. L., editors, *Biotic Interactions in Recent and Fossil Benthic*  
595 *Communities*, volume 3, pages 719–746. Springer US, Boston, MA.
- 596 Bazzaz, F. A. (1990). The response of natural ecosystems to the rising global CO<sub>2</sub> levels. *Annual Review of*  
597 *Ecology and Systematics*, 21:167–196.
- 598 Beck, A. L. and Labandeira, C. C. (1998). Early Permian insect folivory on a gigantopterid-dominated  
599 riparian flora from north-central Texas. *Palaeogeography, Palaeoclimatology, Palaeoecology*, 142:139–173.
- 600 Belcher, C. M., Mander, L., Rein, G., Jarvis, F. X., Haworth, M., Hesselbo, S. P., Glasspool, I. J., and  
601 McElwain, J. C. (2010). Increased fire activity at the Triassic/Jurassic boundary in Greenland due to  
602 climate-driven floral change. *Nature Geoscience*, 3(6):426–429.
- 603 Bernardi, M., Petti, F. M., Kustatscher, E., Franz, M., Hartkopf-Fröder, C., Labandeira, C. C., Wappler,  
604 T., van Konijnenburg-van Cittert, J. H., Peacock, B. R., and Angielczyk, K. D. (2017). Late Permian  
605 (Lopingian) terrestrial ecosystems: A global comparison with new data from the low-latitude Bletterbach  
606 Biota. *Earth-Science Reviews*, 175(May):18–43.
- 607 Blüthgen, N. (2010). Why network analysis is often disconnected from community ecology: A critique and  
608 an ecologist’s guide. *Basic and Applied Ecology*, 11(3):185–195.

- 609 Blüthgen, N., Fründ, J., Vázquez, D. P., and Menzel, F. (2008). What Do Interaction Network Metrics Tell  
610 Us About Specialization and Biological Traits. *Ecology*, 89(12):3387–3399.
- 611 Boyce, C. K. and Zwieniecki, M. A. (2012). Leaf fossil record suggests limited influence of atmospheric  
612 CO<sub>2</sub> on terrestrial productivity prior to angiosperm evolution. *Proceedings of the National Academy of  
613 Sciences*, 109(26):10403–10408.
- 614 Buck, L., Lambdin, P., Paulsen, D., Grant, J., and Saxton, A. (2005). Insect species associated with eastern  
615 hemlock in the Great Smoky Mountains National Park and environs. *Journal of the Tennessee Academy  
616 of Science*, 80(3-4):60–69.
- 617 Bush, A. M., Bambach, R. K., and Daley, G. M. (2007). Changes in theoretical ecospace utilization in marine  
618 fossil assemblages between the mid-Paleozoic and late Cenozoic. *Paleobiology*, 33(1):76–97.
- 619 Bush, A. M. and Novack-Gottshall, P. M. (2012). Modelling the ecological–functional diversification of  
620 marine Metazoa on geological time scales. *Biology Letters*, 8(1):151–155.
- 621 Cariglino, B. (2018). Patterns of insect-mediated damage in a Permian *Glossopteris* flora from Patagonia  
622 (Argentina). *Palaeogeography, Palaeoclimatology, Palaeoecology*, 507:39–51.
- 623 Carvalho, M. R., Wilf, P., Barrios, H., Windsor, D. M., Currano, E. D., Labandeira, C. C., and Jaramillo,  
624 C. A. (2014). Insect leaf-chewing damage tracks herbivore richness in modern and ancient forests. *PLOS  
625 ONE*, 9(5):e94950.
- 626 Chao, A. (1987). Estimating the population size for capture-recapture data with unequal catchability.  
627 *Biometrics*, 43(4):783–791.
- 628 Chao, A. (1989). Estimating population size for sparse data in capture-recapture experiments. *Biometrics*,  
629 45(2):427–438.
- 630 Chao, A., Colwell, R. K., Lin, C.-W., and Gotelli, N. J. (2009). Sufficient sampling for asymptotic minimum  
631 species richness estimators. *Ecology*, 90(4):1125–1133.
- 632 Chao, A., Gotelli, N. J., Hsieh, T. C., Sander, E. L., Ma, K. H., Colwell, R. K., and Ellison, A. M. (2014).  
633 Rarefaction and extrapolation with Hill numbers: A framework for sampling and estimation in species  
634 diversity studies. *Ecological Monographs*, 84(1):45–67.
- 635 Chao, A. and Jost, L. (2012). Coverage-based rarefaction and extrapolation: Standardizing samples by  
636 completeness rather than size. *Ecology*, 93(12):2533–2547.

- 637 Chen, M., Strömberg, C. A. E., and Wilson, G. P. (2019). Assembly of modern mammal community structure  
638 driven by Late Cretaceous dental evolution, rise of flowering plants, and dinosaur demise. *Proceedings of*  
639 *the National Academy of Sciences of the United States of America*, 116(20):9931–9940.
- 640 Chiu, C.-H., Wang, Y.-T., Walther, B. A., and Chao, A. (2014). An improved nonparametric lower bound  
641 of species richness via a modified good–turing frequency formula. *Biometrics*, 70(3):671–682.
- 642 Christenhusz, M. J. M. and Byng, J. W. (2016). The number of known plants species in the world and its  
643 annual increase. *Phytotaxa*, 261(3):201–217.
- 644 Colwell, R. K., Chao, A., Gotelli, N. J., Lin, S. Y., Mao, C. X., Chazdon, R. L., and Longino, J. T.  
645 (2012). Models and estimators linking individual-based and sample-based rarefaction, extrapolation and  
646 comparison of assemblages. *Journal of Plant Ecology*, 5(1):3–21.
- 647 Connell, J. H. (1971). On the role of natural enemies in preventing competitive exclusion in some marine  
648 animals and in rain forest trees. *Dynamics of Populations*, 298:312.
- 649 Cunningham, S. A., Summerhayes, B., and Westoby, M. (1999). Evolutionary divergences in leaf structure  
650 and chemistry, comparing rainfall and soil nutrient gradients. *Ecological Monographs*, 69(4):569–588.
- 651 Currano, E. D. (2009). Patchiness and long-term change in early Eocene insect feeding damage. *Paleobiology*,  
652 35(4):484–498.
- 653 Currano, E. D., Labandeira, C. C., and Wilf, P. (2010). Fossil insect folivory tracks paleotemperature for  
654 six million years. *Ecological Monographs*, 80(4):547–567.
- 655 Currano, E. D., Laker, R., Flynn, A. G., Fogt, K. K., Stradtman, H., and Wing, S. L. (2016). Consequences  
656 of elevated temperature and  $p\text{CO}_2$  on insect folivory at the ecosystem level: Perspectives from the fossil  
657 record. *Ecology and Evolution*, 6(13):4318–4331.
- 658 Currano, E. D., Pinheiro, E. R. S., Buchwaldt, R., Clyde, W. C., and Miller, I. M. (2019). Endemism  
659 in Wyoming plant and insect herbivore communities during the early Eocene hothouse. *Paleobiology*,  
660 45(3):421–439.
- 661 Currano, E. D., Wilf, P., Wing, S. L., Labandeira, C. C., Lovelock, E. C., and Royer, D. L. (2008). Sharply  
662 increased insect herbivory during the Paleocene–Eocene Thermal Maximum. *Proceedings of the National*  
663 *Academy of Sciences of the United States of America*, 105(6):1960–1964.
- 664 Deng, W., Su, T., Wappler, T., Liu, J., Li, S., Huang, J., Tang, H., Low, S. L., Wang, T., Xu, H., Xu, X.,  
665 Liu, P., and Zhou, Z. (2020). Sharp changes in plant diversity and plant-herbivore interactions during the

- 666 Eocene–Oligocene transition on the southeastern Qinghai–Tibetan Plateau. *Global and Planetary Change*,  
667 194:103293.
- 668 Dilling, C., Lambdin, P., Grant, J., and Buck, L. (2007). Insect guild structure associated with eastern  
669 hemlock in the southern Appalachians. *Environmental Entomology*, 36(6):1408–1414.
- 670 DiMichele, W. A., Lucas, S. G., Chaney, D. S., Donovan, M. P., Kerp, H., Koll, R. A., and Looy, C. V.  
671 (2018). Early Permian flora, Doña Ana Mountains, southern New Mexico, with special consideration  
672 of taxonomic issues and arthropod damage. In Lucas, S. G. and Sullivan, R., editors, *Fossil Record 6*,  
673 volume 79 of *New Mexico Museum of Natural History and Science Bulletin*, pages 165–205. New Mexico  
674 Museum of Natural History and Science.
- 675 Ding, Q., Labandeira, C. C., Meng, Q., and Ren, D. (2015). Insect herbivory, plant-host specialization  
676 and tissue partitioning on mid-Mesozoic broadleaved conifers of Northeastern China. *Palaeogeography*,  
677 *Palaeoclimatology, Palaeoecology*, 440:259–273.
- 678 Ding, Q., Labandeira, C. C., and Ren, D. (2014). Biology of a leaf miner (Coleoptera) on *Liaoningocladus*  
679 *boii* (Coniferales) from the Early Cretaceous of northeastern China and the leaf-mining biology of possible  
680 insect culprit clades. *Arthropod Systematics & Phylogeny*, 72(3):281–308.
- 681 Diserud, O. H. and Engen, S. (2000). A general and dynamic species abundance model, embracing the  
682 lognormal and the gamma models. *The American Naturalist*, 155(4):497–511.
- 683 Dmitriev, V. and Zherikin, V. (1988). Changes in the diversity of insect families from data of first and last  
684 occurrences. In Ponomarenko, A., editor, *The Mesozoic-Cenozoic Crisis in the Evolution of Insects*, pages  
685 208–215. Academy of Sciences, Moscow.
- 686 Dobzhansky, T. (1950). Evolution in the tropics. *American scientist*, 38(2):209–221.
- 687 Donovan, M. P., Iglesias, A., Wilf, P., Labandeira, C. C., and Cúneo, N. R. (2017). Rapid recovery of  
688 Patagonian plant–insect associations after the end-Cretaceous extinction. *Nature Ecology & Evolution*,  
689 1(1):0012.
- 690 Donovan, M. P., Iglesias, A., Wilf, P., Labandeira, C. C., and Cúneo, N. R. (2018). Diverse plant–insect  
691 associations from the latest Cretaceous and early Paleocene of Patagonia, Argentina. *Ameghiniana*,  
692 55(3):303–338.
- 693 Donovan, M. P. and Lucas, S. G. (2021). Insect herbivory on the Late Pennsylvanian Kinney Brick Quarry  
694 flora, New Mexico, USA. In Lucas, S. G., DiMichele, W. A., and Allen, B. D., editors, *Kinney Brick*  
695 *Quarry Lagerstätte*, volume 84 of *New Mexico Museum of Natural Science Bulletin*, pages 193–207.

- 696 Donovan, M. P., Wilf, P., Labandeira, C. C., Johnson, K. R., and Peppe, D. J. (2014). Novel insect leaf-  
697 mining after the end-Cretaceous extinction and the demise of Cretaceous leaf miners, Great Plains, USA.  
698 *PLoS ONE*, 9(7):e103542.
- 699 Dos Santos, T. B., De Souza Pinheiro, E. R., and Iannuzzi, R. (2020). First evidence of seed predation by  
700 arthropods from Gondwana and its early Paleozoic history (Rio Bonito Formation, Paraná Basin, Brazil).  
701 *Palaios*, 35(7):292–301.
- 702 Eiseman, C. (2019). *Leafminers of North America*. Self published e-book.
- 703 Feng, Z., Wang, J., Zhou, W.-M., Wan, M.-L., and Pšenička, J. (2020). Plant–insect interactions in the early  
704 Permian Wuda Tuff Flora, North China. *Review of Palaeobotany and Palynology*.
- 705 Filion, L., Payette, S., Robert, É. C., Delwaide, A., and Lemieux, C. (2006). Insect-induced tree dieback and  
706 mortality gaps in high-altitude balsam fir forests of northern New England and adjacent areas. *Écoscience*,  
707 13(2):275–287.
- 708 Foster, D. R., Oswald, W. W., Faison, E. K., Doughty, E. D., and Hansen, B. C. S. (2006). A climatic  
709 driver for abrupt mid-Holocene vegetation dynamics and the hemlock decline in New England. *Ecology*,  
710 87(12):2959–2966.
- 711 Frey, L., Rücklin, M., Korn, D., and Klug, C. (2018). Late Devonian and Early Carboniferous alpha diversity,  
712 ecospace occupation, vertebrate assemblages and bio-events of southeastern Morocco. *Palaeogeography*,  
713 *Palaeoclimatology, Palaeoecology*, 496:1–17.
- 714 Gandolfo, M. A. and Zamalao, M. C. (2021). Southern high-latitude plant-insect interactions from the  
715 Miocene of Tierra del Fuego, Argentina. *International Journal of Plant Sciences*, pages 000–000.
- 716 Gerber, S. (2017). The geometry of morphospaces: Lessons from the classic Raup shell coiling model.  
717 *Biological Reviews*, 92(2):1142–1155.
- 718 Ghosh, A. K., Kar, R., and Chatterjee, R. (2015). Leaf galls on *Dicrodidium hughesii* (Feistmantel) Lele from  
719 the Triassic of India—a new record. *Alcheringa*, 39(1):92–98.
- 720 Giraldo, L. A., Labandeira, C., Herrera, F., and Carvalho, M. (2021). Rich and specialized plant-insect  
721 associations in a Middle–Late Paleocene (58–60 Ma) neotropical rainforest (Bogotá Formation, Colombia).  
722 *Ameghiniana*, 58(2):75–99–75–99.
- 723 Givnish, T. J. (1987). Comparative studies of leaf form: Assessing the relative roles of selective pressures  
724 and phylogenetic constraints. *New Phytologist*, 106(s1):131–160.

- 725 Good, I. J. (1953). The population frequencies of species and the estimation of population parameters.  
726 *Biometrika*, 40(3-4):237–264.
- 727 Gunkel, S. and Wappler, T. (2015). Plant-insect interactions in the upper Oligocene of Enspel (Westerwald,  
728 Germany), including an extended mathematical framework for rarefaction. *Palaeobiodiversity and*  
729 *Palaeoenvironments*, 95(1):55–75.
- 730 Hsieh, T. C., Ma, K. H., and Chao, A. (2016). iNEXT: An R package for rarefaction and extrapolation of  
731 species diversity (Hill numbers). *Methods in Ecology and Evolution*, 7(12):1451–1456.
- 732 Iannuzzi, R. and Labandeira, C. C. (2008). The oldest record of external foliage feeding and the expansion  
733 of insect folivory on land. *Annals of the Entomological Society of America*, 101(1):79–94.
- 734 Janzen, D. H. (1970). Herbivores and the number of tree species in tropical forests. *The American Naturalist*,  
735 104(940):501–528.
- 736 Janzen, D. H. (1973). Host plants as islands. II. Competition in evolutionary and contemporary time. *The*  
737 *American Naturalist*, 107(958):786–790.
- 738 Jarzembowski, E. A. and Ross, A. J. (1996). Insect origination and extinction in the Phanerozoic. *Geological*  
739 *Society of London, Special Publications*, 102(1):65–78.
- 740 Jost, L. (2010). The relation between evenness and diversity. *Diversity*, 2(2):207–232.
- 741 Kaplan, I. and Denno, R. F. (2007). Interspecific interactions in phytophagous insects revisited: A  
742 quantitative assessment of competition theory. *Ecology Letters*, 10(10):977–994.
- 743 Knezevic, A. (2008). Overlapping confidence intervals and statistical significance. *StatNews: Cornell*  
744 *University Statistical Consulting Unit*, 73(1).
- 745 Knobbe, T. K. and Schaller, M. F. (2017). A tight coupling between atmospheric  $p\text{CO}_2$  and sea-surface  
746 temperature in the Late Triassic. *Geology*, 46(1):43–46.
- 747 Knope, M. L., Heim, N. A., Frishkoff, L. O., and Payne, J. L. (2015). Limited role of functional differentiation  
748 in in early diversification of animals. *Nature Communications*, 6:6455.
- 749 Knor, S., Prokop, J., Kvaček, Z., Janovský, Z., and Wappler, T. (2012). Plant–arthropod associations  
750 from the Early Miocene of the Most Basin in North Bohemia—Palaeoecological and palaeoclimatological  
751 implications. *Palaeogeography, Palaeoclimatology, Palaeoecology*, 321-322:102–112.



- 752 Labandeira, C. C. (2002). Paleobiology of middle Eocene plant-insect associations from the Pacific Northwest:  
753 A preliminary report. *Rocky Mountain Geology*, 37(1):31–59.
- 754 Labandeira, C. C. (2006). The four phases of plant-arthropod associations in deep time. *Geologica Acta*,  
755 4(4):409–438.
- 756 Labandeira, C. C. (2012). Evidence for outbreaks from the fossil record of insect herbivory. In Barbosa, P.,  
757 Letourneau, D. K., and Agrawal, A. A., editors, *Insect Outbreaks Revisited*, chapter 13, pages 267–290.  
758 Blackwell Publishing Ltd., Hoboken, NJ.
- 759 Labandeira, C. C. (2021). Ecology and evolution of gall-inducing arthropods: The pattern from the terrestrial  
760 fossil record. *Frontiers in Ecology and Evolution*, 9:632449.
- 761 Labandeira, C. C., Anderson, J. M., and Anderson, H. M. (2018). Expansion of arthropod herbivory in Late  
762 Triassic South Africa: The Molteno Biota, Aasvoëlberg 411 site and developmental biology of a gall. In  
763 Tanner, L. H., editor, *The Late Triassic World: Earth in a Time of Transition*, pages 623–719. Springer  
764 International Publishing, Cham.
- 765 Labandeira, C. C. and Currano, E. D. (2013). The fossil record of plant–insect dynamics. *Annual Review of*  
766 *Earth and Planetary Sciences*, 41(1):287–311.
- 767 Labandeira, C. C., Dilcher, D. L., Davis, D. R., and Wagner, D. L. (1994). Ninety-seven million years of  
768 angiosperm-insect association: Paleobiological insights into the meaning of coevolution. *Proceedings of the*  
769 *National Academy of Sciences of the United States of America*, 91(25):12278–12282.
- 770 Labandeira, C. C., Johnson, K. R., and Lang, P. (2002a). A preliminary assessment of insect herbivory  
771 across the Cretaceous/Tertiary boundary: Extinction and minimal rebound. In Hartman, J., Johnson,  
772 K. R., and Nichols, D., editors, *The Hell Creek Formation and the Cretaceous-Tertiary Boundary in the*  
773 *Northern Great Plains-An Integrated Continental Record at the End of the Cretaceous*, number 361, pages  
774 297–327. Geological Society of America Special Paper, Boulder, Colorado.
- 775 Labandeira, C. C., Johnson, K. R., and Wilf, P. (2002b). Impact of the terminal Cretaceous event on  
776 plant–insect associations. *Proceedings of the National Academy of Sciences of the United States of America*,  
777 99(4):2061–2066.
- 778 Labandeira, C. C., Kustatscher, E., and Wappler, T. (2016). Floral assemblages and patterns of insect  
779 herbivory during the Permian to Triassic of northeastern Italy. *PLoS ONE*, 11:e0165205.
- 780 Labandeira, C. C. and Sepkoski, J. J. (1993). Insect diversity in the fossil record. *Science*, 261(5119):310–315.

- 781 Labandeira, C. C., Tremblay, S. L., Bartowski, K. E., and VanAller Hernick, L. (2013). Middle Devonian  
782 liverwort herbivory and antiherbivore defence. *New Phytologist*, 200:247–258.
- 783 Labandeira, C. C., Wilf, P., Johnson, K. R., and Marsh, F. (2007). *Guide to Insect (and Other) Damage*  
784 *Types on Compressed Plant Fossils (Version 3.0)*. Smithsonian Institution, Washington DC.
- 785 Laing, B. A., Mángano, M. G., Buatois, L. A., Narbonne, G. M., and Gougeon, R. C. (2019). A protracted  
786 Ediacaran–Cambrian transition: An ichnologic ecospace analysis of the Fortunian in Newfoundland,  
787 Canada. *Geological Magazine*, 156(9):1623–1630.
- 788 Li, L., Wang, Y., Kürschner, W. M., Ruhl, M., and Vajda, V. (2020). Palaeovegetation and  
789 palaeoclimate changes across the Triassic–Jurassic transition in the Sichuan Basin, China. *Palaeogeography,*  
790 *Palaeoclimatology, Palaeoecology*, 556:109891.
- 791 Liu, H.-Y., Wei, H.-B., Chen, J., Guo, Y., Zhou, Y., Gou, X.-D., Yang, S.-L., Labandeira, C., and Feng, Z.  
792 (2020). A latitudinal gradient of plant–insect interactions during the late Permian in terrestrial ecosystems?  
793 New evidence from Southwest China. *Global and Planetary Change*, 192:103248.
- 794 Lohman, B. K., Berner, D., and Bolnick, D. I. (2017). Clines arc through multivariate morphospace. *The*  
795 *American Naturalist*, 189(4):354–367.
- 796 Lucas, S. G. (2021). Nonmarine Mass Extinctions. *Paleontological Research*, 25(4).
- 797 Lucas, S. G., DiMichele, W. A., Krainer, K., Barrick, J. E., Vachard, D., P. Donovan, M., Looy, C., Kerp, H.,  
798 and Chaney, D. S. (2021). *The Pennsylvanian System in the Sacramento Mountains, New Mexico, USA:*  
799 *Stratigraphy, Petrography, Depositional Systems, Paleontology, Biostratigraphy and Geologic History*. The  
800 Smithsonian Institution.
- 801 Ma, F.-J., Ling, C.-C., Ou-Yang, M.-S., Yang, G.-M., Shen, X.-P., and Wang, Q.-J. (2020). Plant–insect  
802 interactions from the Miocene (Burdigalian–Langhian) of Jiangxi, China. *Review of Palaeobotany and*  
803 *Palynology*, 275:104176.
- 804 MacArthur, R. H. (1969). Patterns of communities in the tropics. *Biological Journal of the Linnean Society*,  
805 1(1-2):19–30.
- 806 Maccracken, S. A. (2020). *Plant–Arthropod Associations from the Western Interior of North America during*  
807 *the Late Cretaceous*. PhD thesis, University of Maryland, College Park, MD.

- 808 Maccracken, S. A. and Labandeira, C. C. (2020). The Middle Permian South Ash Pasture assemblage  
809 of north-central Texas: Coniferophyte and gigantopterid herbivory and longer-term herbivory trends.  
810 *International Journal of Plant Sciences*, 181(3):342–362.
- 811 Martinez, A. J., Onchuru, T. O., Ingham, C. S., Sandoval-Calderón, M., Salem, H., Deckert, J., and  
812 Kaltenpoth, M. (2019). Angiosperm to Gymnosperm host-plant switch entails shifts in microbiota of  
813 the *Welwitschia* bug, *Probergrothius angolensis* (Distant, 1902). *Molecular Ecology*, 28(23):5172–5187.
- 814 Mattson, W. J. (1980). Herbivory in relation to plant nitrogen content. *Annual Review of Ecology and*  
815 *Systematics*, 11(1):119–161.
- 816 McElwain, J. C. and Punyasena, S. W. (2007). Mass extinction events and the plant fossil record. *Trends*  
817 *in Ecology & Evolution*, 22(10):548–557.
- 818 McGarigal, K., Cushman, S. A., and Stafford, S. (2013). *Multivariate Statistics for Wildlife and Ecology*  
819 *Research*. Springer.
- 820 McGhee, G. R. (2006). The concept of the theoretical morphospace. In *The Geometry of Evolution: Adaptive*  
821 *Landscapes and Theoretical Morphospaces*, pages 57–70. Cambridge University Press, Cambridge.
- 822 McLoughlin, S., Martin, S. K., and Beattie, R. (2015). The record of Australian Jurassic plant–arthropod  
823 interactions. *Gondwana Research*, 27:940–959.
- 824 McMurtrie, R. E., Norby, R. J., Medlyn, B. E., Dewar, R. C., Pepper, D. A., Reich, P. B., and Barton, C.  
825 V. M. (2008). Why is plant-growth response to elevated CO<sub>2</sub> amplified when water is limiting, but reduced  
826 when nitrogen is limiting? A growth-optimisation hypothesis. *Functional Plant Biology*, 35(6):521.
- 827 Mills, B. J. W., Krause, A. J., Scotese, C. R., Hill, D. J., Shields, G. A., and Lenton, T. M. (2019). Modelling  
828 the long-term carbon cycle, atmospheric CO<sub>2</sub>, and Earth surface temperature from late Neoproterozoic  
829 to present day. *Gondwana Research*, 67:172–186.
- 830 Minter, N. J., Buatois, L. A., Mángano, M. G., Davies, N. S., Gibling, M. R., MacNaughton, R. B., and  
831 Labandeira, C. C. (2017). Early bursts of diversification defined the faunal colonization of land. *Nature*  
832 *Ecology & Evolution*, 1:0175.
- 833 Moles, A. T., Bonser, S. P., Poore, A. G. B., Wallis, I. R., and Foley, W. J. (2011). Assessing the evidence  
834 for latitudinal gradients in plant defence and herbivory. *Functional Ecology*, 25(2):380–388.
- 835 Möller, A. L., Kaulfuss, U., Lee, D. E., and Wappler, T. (2017). High richness of insect herbivory from the  
836 early Miocene Hindon Maar crater, Otago, New Zealand. *PeerJ*, 5:e2985.

- 837 Mondal, S. and Harries, P. J. (2016). Phanerozoic trends in ecospace utilization: The bivalve perspective.  
838 *Earth-Science Reviews*, 152:106–118.
- 839 Moreira, X., Abdala-Roberts, L., Parra-Tabla, V., and Mooney, K. A. (2015). Latitudinal variation in  
840 herbivory: Influences of climatic drivers, herbivore identity and natural enemies. *Oikos*, 124(11):1444–  
841 1452.
- 842 Müller, C., Wappler, T., and Kunzmann, L. (2017). Insect herbivory patterns in late Eocene coastal lowland  
843 riparian associations from central Germany. *Palaeogeography, Palaeoclimatology, Palaeoecology*, 491:170–  
844 184.
- 845 Na, Y.-L., Sun, C.-L., Wang, H., Dilcher, D. L., Yang, Z.-Y., Li, T., and Li, Y.-F. (2018). Insect herbivory  
846 and plant defense on ginkgoalean and bennettitalean leaves of the Middle Jurassic Daohugou Flora from  
847 Northeast China and their paleoclimatic implications. *Palaeoworld*, 27(2):202–210.
- 848 Novack-Gottshall, P. M. (2007). Using a theoretical ecospace to quantify the ecological diversity of Paleozoic  
849 and modern marine biotas. *Paleobiology*, 33(2):273–294.
- 850 O’hara, R. B. (2005). Species richness estimators: How many species can dance on the head of a pin?  
851 *Journal of Animal Ecology*, 74(2):375–386.
- 852 Olszewski, T. D. (2004). A unified mathematical framework for the measurement of richness and evenness  
853 within and among multiple communities. *Oikos*, 104(2):377–387.
- 854 Orwig, D. A. and Foster, D. R. (1998). Forest response to the introduced hemlock woolly adelgid in southern  
855 New England, USA. *The Journal of the Torrey Botanical Society*, 125(1):60–73.
- 856 Oswald, W. W. (2016). Evaluating the role of insects in the middle-Holocene *Tsuga* decline. *The Journal of*  
857 *the Torrey Botanical Society*, 144(1):35–39.
- 858 Palmer, M. W. (1990). The estimation of species richness by extrapolation. *Ecology*, 71(3):1195–1198.
- 859 Pellmyr, O. (1992). Evolution of insect pollination and angiosperm diversification. *Trends in Ecology &*  
860 *Evolution*, 7(2):46–49.
- 861 Pie, M. R. and Weitz, J. S. (2005). A null model of morphospace occupation. *The American Naturalist*,  
862 166(1):E1–E13.
- 863 Pinheiro, E. R. S., Iannuzzi, R., and Duarte, L. D. S. (2016). Insect herbivory fluctuations through geological  
864 time. *Ecology*, 97(9):2501–2510.

- 865 Prevec, R., Labandeira, C. C., Neveling, J., Gastaldo, R. A., Looy, C. V., and Bamford, M. (2009). Portrait  
866 of a Gondwanan ecosystem: A new late Permian fossil locality from KwaZulu-Natal, South Africa. *Review*  
867 *of Palaeobotany and Palynology*, 156(3-4):454–493.
- 868 Price, P. W., Bouton, C. E., Gross, P., McPherson, B. A., Thompson, J. N., and Weis, A. E. (1980).  
869 Interactions among three trophic levels: Influence of plants on interactions between insect herbivores and  
870 natural enemies. *Annual Review of Ecology and Systematics*, 11(1):41–65.
- 871 Puttick, M. N., Guillaume, T., and Wills, M. A. (2020). The complex effects of mass extinctions on  
872 morphological disparity. *Evolution*, 74(10):2207–2220.
- 873 Ramírez-Barahona, S., Sauquet, H., and Magallón, S. (2020). The delayed and geographically heterogeneous  
874 diversification of flowering plant families. *Nature Ecology & Evolution*, 4:1232–1238.
- 875 Raup, D. M. (1967). Geometric analysis of shell coiling: Coiling in ammonoids. *Journal of Paleontology*,  
876 41(1):43–65.
- 877 Reich, P. B., Hobbie, S. E., and Lee, T. D. (2014). Plant growth enhancement by elevated CO<sub>2</sub> eliminated  
878 by joint water and nitrogen limitation. *Nature Geoscience*, 7(12):920–924.
- 879 Robledo, J. M., Pinheiro, E. R. S., Gnaedinger, S. C., and Wappler, T. (2018). Plant–insect interactions on  
880 dicots and ferns from the Miocene of Argentina. *Palaios*, 33(7):338–352.
- 881 Ruhl, M. and Kürschner, W. M. (2011). Multiple phases of carbon cycle disturbance from large igneous  
882 province formation at the Triassic-Jurassic transition. *Geology*, 39(5):431–434.
- 883 Salazar, D. and Marquis, R. J. (2012). Herbivore pressure increases toward the equator. *Proceedings of the*  
884 *National Academy of Sciences*, 109(31):12616–12620.
- 885 Santos, A. A., Sender, L. M., Wappler, T., Engel, M. S., and Diez, J. B. (2021). A Robinson Crusoe story  
886 in the fossil record: Plant-insect interactions from a Middle Jurassic ephemeral volcanic island (Eastern  
887 Spain). *Palaeogeography, Palaeoclimatology, Palaeoecology*, 583:110655.
- 888 Schachat, S. R., Labandeira, C. C., and Chaney, D. S. (2015). Insect herbivory from early Permian Mitchell  
889 Creek Flats of north-central Texas: Opportunism in a balanced component community. *Palaeogeography,*  
890 *Palaeoclimatology, Palaeoecology*, 440:830–847.
- 891 Schachat, S. R., Labandeira, C. C., Gordon, J., Chaney, D., Levi, S., Halthore, M. N., and Alvarez, J.  
892 (2014). Plant–insect interactions from Early Permian (Kungurian) Colwell Creek Pond, north-central

- 893 Texas: The early spread of herbivory in riparian environments. *International Journal of Plant Sciences*,  
894 175(8):855–890.
- 895 Schachat, S. R., Labandeira, C. C., and Maccracken, S. A. (2018). The importance of sampling  
896 standardization for comparisons of insect herbivory in deep time: A case study from the late Palaeozoic.  
897 *Royal Society Open Science*, 5(3):171991.
- 898 Schachat, S. R., Maccracken, S. A., and Labandeira, C. C. (2020). Sampling fossil floras for the study of  
899 insect herbivory: How many leaves is enough? *Fossil Record*, 23(1):15–32.
- 900 Scott, A. C., Stephenson, J., and Chaloner, W. G. (1992). Interaction and coevolution of plants and  
901 arthropods during the Palaeozoic and Mesozoic. *Philosophical Transactions of the Royal Society of London.*  
902 *Series B: Biological Sciences*, 335(1274):129–165.
- 903 Shaw, M. R., Zavaleta, E. S., Chiariello, N. R., Cleland, E. E., Mooney, H. A., and Field, C. B.  
904 (2002). Grassland responses to global environmental changes suppressed by elevated CO<sub>2</sub>. *Science*,  
905 298(5600):1987–1990.
- 906 Simard, I., Morin, H., and Potelle, B. (2002). A new paleoecological approach to reconstruct long-term  
907 history of spruce budworm outbreaks. *Canadian Journal of Forest Research*, 32(3):428–438.
- 908 Smith, D. M. (2008). A comparison of plant–insect associations in the middle Eocene Green River Formation  
909 and the upper Eocene Florissant Formation and their climatic implications. *Geological Society of America*  
910 *Special Paper*, 435(303):89–103.
- 911 Smith, E. P. and van Belle, G. (1984). Nonparametric estimation of species richness. *Biometrics*, 40(1):119–  
912 129.
- 913 Smith, F. A., Brown, J. H., and Valone, T. J. (1997). Path analysis: A critical evaluation using long-term  
914 experimental data. *The American Naturalist*, 149(1):29–42.
- 915 Soltis, P. S. and Soltis, D. E. (2004). The origin and diversification of angiosperms. *American Journal of*  
916 *Botany*, 91(10):1614–1626.
- 917 Tamme, R., Hiiesalu, I., Laanisto, L., Szava-Kovats, R., and Pärtel, M. (2010). Environmental heterogeneity,  
918 species diversity and co-existence at different spatial scales. *Journal of Vegetation Science*, 21(4):796–801.
- 919 Turcotte, M. M., Thomsen, C. J. M., Broadhead, G. T., Fine, P. V. A., Godfrey, R. M., Lamarre, G. P. A.,  
920 Meyer, S. T., Richards, L. A., and Johnson, M. T. J. (2014). Percentage leaf herbivory across vascular  
921 plant species. *Ecology*, 95(3):788–788.

- 922 Valentine, J. W. (1969). Patterns of taxonomic and ecological structure of the shelf benthos during  
923 Phanerozoic time. *Palaeontology*, 12(4):684–709.
- 924 van Veen, F. F., Morris, R. J., and Godfray, H. C. J. (2006). Apparent competition, quantitative food webs,  
925 and the structure of phytophagous insect communities. *Annual Review of Entomology*, 51(1):187–208.
- 926 Wagner, S. M., Martinez, A. J., Ruan, Y.-M., Kim, K. L., Lenhart, P. A., Dehnel, A. C., Oliver, K. M.,  
927 and White, J. A. (2015). Facultative endosymbionts mediate dietary breadth in a polyphagous herbivore.  
928 *Functional Ecology*, 29(11):1402–1410.
- 929 Wappler, T. (2010). Insect herbivory close to the Oligocene–Miocene transition—A quantitative analysis.  
930 *Palaeogeography, Palaeoclimatology, Palaeoecology*, 292(3-4):540–550.
- 931 Wappler, T., Currano, E. D., Wilf, P., Rust, J., and Labandeira, C. C. (2009). No post-Cretaceous ecosystem  
932 depression in European forests? Rich insect-feeding damage on diverse middle Palaeocene plants, Menat,  
933 France. *Proceedings of the Royal Society B: Biological Sciences*, 276:4271–4277.
- 934 Wappler, T. and Denk, T. (2011). Herbivory in early Tertiary Arctic forests. *Palaeogeography,*  
935 *Palaeoclimatology, Palaeoecology*, 310(3-4):283–295.
- 936 Wappler, T. and Grímsson, F. (2016). Before the ‘Big Chill’: Patterns of plant-insect associations from the  
937 Neogene of Iceland. *Global and Planetary Change*, 142:73–86.
- 938 Wappler, T., Kustatscher, E., and Dellantonio, E. (2015). Plant–insect interactions from Middle Triassic (late  
939 Ladinian) of Monte Agnello (Dolomites, N-Italy)—Initial pattern and response to abiotic environmental  
940 perturbations. *PeerJ*, 3:e921.
- 941 Wappler, T., Labandeira, C. C., Rust, J., Frankenhäuser, H., and Wilde, V. (2012). Testing for the effects  
942 and consequences of mid Paleogene climate change on insect herbivory. *PLoS ONE*, 7(7).
- 943 White, D. A. (1993). Relationships between foliar number and the cross-sectional areas of sapwood and  
944 annual rings in red oak (*Quercus rubra*) crowns. *Canadian Journal of Forest Research*, 23(7):1245–1251.
- 945 Wiedl, T., Harzhauser, M., Kroh, A., Čorić, S., and Piller, W. E. (2013). Ecospace variability along  
946 a carbonate platform at the northern boundary of the Miocene reef belt (Upper Langhian, Austria).  
947 *Palaeogeography, Palaeoclimatology, Palaeoecology*, 370:232–246.
- 948 Wilf, P. and Labandeira, C. C. (1999). Response of plant-insect associations to Paleocene–Eocene warming.  
949 *Science*, 284(5423):2153–2156.

- 950 Wilf, P., Labandeira, C. C., Johnson, K. R., Coley, P. D., and Cutter, A. D. (2001). Insect herbivory, plant  
951 defense, and early Cenozoic climate change. *Proceedings of National Academy of Sciences of the United*  
952 *States of America*, 98(11):6221–6226.
- 953 Wilf, P., Labandeira, C. C., Johnson, K. R., and Cuneo, N. R. (2005). Richness of plant–insect associations  
954 in Eocene Patagonia: A legacy for South American biodiversity. *Proceedings of National Academy of*  
955 *Sciences of the United States of America*, 102(25):8944–8948.
- 956 Wilf, P., Labandeira, C. C., Johnson, K. R., and Ellis, B. (2006). Decoupled plant and insect diversity after  
957 the end-Cretaceous extinction. *Science*, 313(5790):1112–1115.
- 958 Will, T., Furch, A. C., and Zimmermann, M. R. (2013). How phloem-feeding insects face the challenge of  
959 phloem-located defenses. *Frontiers in Plant Science*, 4:336.
- 960 Wilson, J. P. and Knoll, A. H. (2010). A physiologically explicit morphospace for tracheid-based water  
961 transport in modern and extinct seed plants. *Paleobiology*, 36(2):335–355.
- 962 Wing, S. L., Herrera, F., Jaramillo, C. A., Gómez-Navarro, C., Wilf, P., and Labandeira, C. C. (2009). Late  
963 Paleocene fossils from the Cerrejón Formation, Colombia, are the earliest record of Neotropical rainforest.  
964 *Proceedings of the National Academy of Sciences of the United States of America*, 106(44):18627–18632.
- 965 Xiao, L., Labandeira, C., Dilcher, D., and Ren, D. (2021). Florivory of Early Cretaceous flowers by  
966 functionally diverse insects: Implications for early angiosperm pollination. *Proceedings of the Royal Society*  
967 *B: Biological Sciences*, 288(1953):20210320.
- 968 Xu, Q., Jin, J., and Labandeira, C. C. (2018). Williamson Drive: Herbivory on a north-central Texas flora  
969 of latest Pennsylvanian age shows discrete component community structure, expansion of piercing and  
970 sucking, and plant counterdefenses. *Review of Palaeobotany and Palynology*, 251:28–72.
- 971 Zeebe, R. E. and Lourens, L. J. (2019). Solar System chaos and the Paleocene–Eocene boundary age  
972 constrained by geology and astronomy. *Science*, 365(6456):926–929.
- 973 Zhang, S.-H., Chen, T.-Y., Zeng, X., Yu, Y., Zhang, Y., and Xie, S.-P. (2018). Plant–insect associations  
974 from the upper Miocene of Lincang, Yunnan, China. *Review of Palaeobotany and Palynology*, 259:55–62.
- 975 Zhang, Y., Adams, J. M., and Zhao, D. (2011). Does insect folivory vary with latitude among temperate  
976 deciduous forests? *Ecological Research*, 26:377–383.



## 9 SUPPLEMENTAL MATERIAL

### 9.1 DIFFICULTIES IN ESTIMATING DAMAGE TYPE DIVERSITY

The differences in sampling intensity among Colwell Creek Pond and Mitchell Creek Flats pose an insurmountable obstacle to estimating true damage type diversity with raw or rarefied data. Rarefaction curves that include the dominant broadleaf plant taxa from both assemblages show that the estimate of higher damage type diversity for Colwell Creek Pond cannot be disentangled from the disparities in the amount of surface area examined (Figure S1A). If the damage type diversities tallied at each assemblage, 45 at Colwell Creek Pond and 19 at Mitchell Creek Flats, are interpreted at face value, the resulting conclusion that former contains greater damage type diversity is based entirely on an artifact of uneven sampling. However, even when the role of sampling completeness is taken into account, the overlapping confidence intervals complicate estimates of whether greater sampling would reveal significant differences in damage type diversity among the two assemblages (Knezevic, 2008).

The unreliability of diversity estimates derived from incompletely sampled assemblages is further underscored by the variability of estimated damage type diversity at Colwell Creek Pond when rarefaction curves are calculated with leaves from this locality that are randomly sampled only to the amount of surface area seen at Mitchell Creek Flats (Figure S1B–D). In other words, the difficulty of extrapolating damage type diversity at Mitchell Creek Flats for the amount of leaf area sampled from Colwell Creek Pond is due not only to the uncertainty surrounding damage type diversity beyond the amount of leaf area available, but also to the uncertainty surrounding the reliability of the damage type diversity estimated for Mitchell Creek Flats at the amount of leaf area that has been examined for this assemblage. Comparisons of damage type diversity, therefore, require a method such as rarefaction to control for differences in sampling completeness, and require fairly complete sampling of all localities—which can be difficult to achieve due to both the availability of fossil material and the investigator effort required.

The difficulty of estimating damage type diversity in light of sampling incompleteness is further compounded by the unavailability of surface area data for nearly all assemblages examined thus far (Schachat et al., 2018). Because leaf size varies so widely, two assemblages can have equivalent numbers of damage types per 400 cm<sup>2</sup> of leaf surface area while having widely different numbers of damage types per 400 leaves. Variable leaf surface area can complicate, if not invalidate, attempts to use damage type data to discern macroevolutionary and macroecological patterns. For example, the amount of surface area per leaf available to insect herbivores has changed through time because gymnosperms and angiosperms have different average leaf sizes. As another example, whereas heightened levels of insect herbivory in the tropics

1008 form the basis of various biogeographical theories (Dobzhansky, 1950; MacArthur, 1969; Janzen, 1970;  
1009 Connell, 1971), the magnitude of the latitudinal variability in herbivory is not entirely understood and  
1010 depends considerably on the metric used (Anstett et al., 2014; Andrew and Hughes, 2005; Adams et al.,  
1011 2011, 2009; Zhang et al., 2011; Adams and Zhang, 2009; Adams et al., 2010; Salazar and Marquis, 2012;  
1012 Moreira et al., 2015; Moles et al., 2011). And because plants in wet biomes tend to have larger leaves  
1013 (Ackerly et al., 2002; Cunningham et al., 1999; Givnish, 1987), rarefaction curves that are scaled by  
1014 number of leaves rather than amount of leaf surface area may confound increased damage type diversity in  
1015 wet tropical forests with increased leaf size in these habitats.

1016 In addition to subsampling techniques such as rarefaction, a number of population estimators hold the  
1017 potential to calculate true (asymptotic) damage type diversity and corresponding confidence intervals from  
1018 datasets of varying levels of completeness (Chao, 1987; Chiu et al., 2014; O'hara, 2005; Palmer, 1990; Smith  
1019 and van Belle, 1984). Of these, the Chao1 estimator is particularly well-suited to sparse datasets (Chao,  
1020 1989). However, these estimators follow the same pattern seen in rarefaction curves of steeply increasing  
1021 estimates of diversity at low levels of sampling completeness (Chao et al., 2009). One might hope that the  
1022 Chao1 estimator would behave like estimates of the herbivory index, with confidence intervals that contain  
1023 the true value even when sampling is very incomplete and then narrowing more closely around the true value  
1024 as sampling becomes more complete. However, this often is not the case. An analysis of plant assemblages  
1025 for which at least 1,000 broadleaf specimens have been examined for insect herbivory (Tables 1, 2) shows  
1026 that confidence intervals are deceptively narrow when sampling is insufficiently complete to capture the true  
1027 value of damage type diversity (Figure S2). As sampling increases, the confidence intervals are more likely  
1028 to contain an accurate result but often widen so much that false negative results become inevitable (Figure  
1029 S2).

1030 Whereas neither rarefaction nor the Chao1 estimator provide sufficient accuracy and precision to estimate  
1031 damage type diversity, they have the potential to work far better in concert. The combination of rarefaction  
1032 and Hill numbers (Chao et al., 2014), a family of metrics to which the Chao1 estimator belongs, was an  
1033 extension of advances in the extrapolation of rarefaction curves (Colwell et al., 2012) and in rarefaction based  
1034 on sampling completeness rather than sample size (Chao and Jost, 2012). The Chao1 estimator return an  
1035 identical point estimates and confidence intervals for asymptotic diversity for a given frequency of damage  
1036 type occurrences regardless of whether those damage type occurrences are spread out over 10 or 100,000  
1037 leaves. But, unlike the Chao1 estimator, rarefaction has the advantage of taking sampling completeness into  
1038 account while generating diversity estimates. Unlike rarefaction, the Chao1 estimator has the advantage  
1039 of robustness to differences in leaf size and fragmentation because this metric estimates true, asymptotic  
1040 diversity rather than diversity at a particular level of incomplete sampling. The method of Chao et al. (2014)

1041 possesses both of these advantages and is implemented in the R package `iNEXT` (Hsieh et al., 2016).

1042 However, the method of Chao et al. (2014) yields estimates of asymptotic damage type diversity that are  
1043 biased by the number of leaves sampled. This is probably because of the extreme sparsity of damage type  
1044 occurrence datasets combined with the large quantity of damage types that are only observed once. The  
1045 sensitivity of this method to sampling completeness can be seen when comparing the rarefaction curves for  
1046 assemblages with over 7,000 leaves examined to extrapolated rarefaction curves generated after subsampling  
1047 each assemblage down to 1,000 or 2,000 leaves (Figure S3). 2,000 leaves are rarely sufficient to extrapolate  
1048 the complete rarefaction curve, and 1,000 leaves are sufficient for only one assemblage, Willershausen (Adroit  
1049 et al., 2018). With 1,000 leaves, these extrapolated rarefaction curves level off far too quickly—and even for  
1050 Willershausen, the one assemblage that does not follow this pattern, the 95% confidence interval is much too  
1051 wide to permit the detection of significant differences in damage type diversity among most assemblages.

## 1052 9.2 THE UNRELIABILITY OF EXTRAPOLATED DIVERSITY ESTIMATES 1053 GENERATED WITH COVERAGE-BASED RAREFACTION

1054 To evaluate whether rarefied damage type diversity at a sample coverage of 0.8 can be extrapolated from  
1055 datasets that do not reach this level of coverage, we used an iterative subsampling procedure. Leaves were  
1056 subsampled from the pre-angiosperm assemblage with the largest number of leaves examined, Aasvoëlberg  
1057 411 (Labandeira et al., 2018), and the angiosperm assemblage with the largest number of leaves examined,  
1058 Willershausen (Adroit et al., 2018). This procedure was repeated 3,000 times for each assemblage to ensure  
1059 that a wide range of levels of sample coverage are represented among the subsampled datasets. For each  
1060 subsampled dataset, we extrapolated rarefied damage type diversity to a sample coverage of 0.8. The results  
1061 of this procedure (Figure S4) show that the accuracy of extrapolated estimates of damage type diversity  
1062 does increase with sample coverage, but these extrapolated estimates are never accurate enough to inspire  
1063 any confidence. Therefore, we do not recommend extrapolating estimates of damage type diversity for  
1064 assemblages with a sample coverage below 0.79.

## 1065 9.3 EVALUATION OF OTHER METRICS

1066 The ecological literature contains a variety of complex metrics for the evaluation of trophic interactions.  
1067 With paleontological data, and especially paleontological data from a clade with a history of biased collecting  
1068 (Gunkel and Wappler, 2015), a fundamental question is whether the data at hand are sufficient to yield robust  
1069 results when analyzed with more complex techniques.

1070 Both plants and their damage types follow a dominance-diversity distribution that approximates a

1071 lognormal or gamma distribution (Figure S5), as do nearly all other biotic communities (Diserud and  
1072 Engen, 2000). In a typical floral assemblage, the majority of plant hosts and damage types are rare.

1073       Generating a standardized estimate of floral or damage type diversity at a given assemblage through  
1074 rarefaction is a relatively simple matter of subsampling the more abundant taxa in a consistent fashion.  
1075 Estimating relationships among plant hosts and damage types, however—for example, estimating the  
1076 proportion of damage types on the second-most abundant plant host which also occur on the most  
1077 abundant plant host—is a far more complex matter, and thus is far more sensitive to sample size. A single  
1078 tree can grow thousands of leaves in a single year (White, 1993), but it is uncommon for thousands of  
1079 leaves from a single fossil assemblage to be examined for insect herbivory (Tables 1 and 2). We are not sure  
1080 if all fossil leaf material ever examined for the herbivory index contains more or less leaf surface area than a  
1081 single elm tree.

1082       Therefore, whereas the amount of sampling typically seen in studies of fossil herbivory is likely sufficient to  
1083 determine whether the most common damage type at an assemblage occurs on the most common plant host  
1084 at the assemblage, this amount of sampling is probably not sufficient to determine whether the twentieth-  
1085 most-common damage type occurs on the twentieth-most-common plant host. The absence of the twentieth-  
1086 most-common damage type on the twentieth-most-common plant host may indicate that this particular  
1087 interaction did not occur in the community represented by the fossil assemblage, but can just as easily  
1088 indicate that sampling is not sufficient to document this interaction.

1089       To evaluate the reliability of complex metrics of insect herbivory calculated for fossil assemblages, we  
1090 conducted two iterative subsampling routines with data from the pre-angiosperm assemblage with the largest  
1091 number of leaves examined, Aasvoëlberg 411 (Labandeira et al., 2018), and the angiosperm assemblage with  
1092 the largest number of leaves examined, Willershausen (Adroit et al., 2018). In both routines, we subsampled  
1093 1,000 leaves per iteration and iterated this procedure 1,000 times. For the first routine, we calculated the  
1094 proportion of damage types occurring on the second-most-abundant plant host that also occur on the most  
1095 abundant plant host. (This is perhaps the simplest metric of the nestedness of damage type communities  
1096 among the plant hosts at an assemblage.) For the second routine, we divided the number of leaves belonging  
1097 to the second-most-abundant plant host by the number of leaves belonging to the most abundant plant host.  
1098 (The simplicity of this metric is emblematic of the metrics commonly used in the study of fossil herbivory.)

1099       The results of these subsampling routines indicate that, whereas the dominance-diversity structure of  
1100 the plant hosts within an assemblage is a valid and reliable metric (Figure S6B), the nestedness of damage  
1101 type communities among individual plant hosts is not (Figure S6A). No sensitivity analyses are needed  
1102 to demonstrate the impossibility of determining with any certainty whether the twentieth-most-common  
1103 damage type at an assemblage is truly absent from the twentieth-most-common plant host—as opposed to

1104 evading detection due to the number of leaves examined. One could argue that this sort of failure of detection  
1105 will be shared across all assemblages and therefore will not bias comparisons among assemblages. However,  
1106 our sensitivity analysis demonstrates that even the very simplest measurement of damage type nestedness  
1107 (the degree of nestedness among the two most abundant plant hosts) is hopelessly unreliable with 1,000  
1108 leaves.

1109 Some analytical trends in paleobiology follow a boom–bust cycle in which a technique increases in  
1110 popularity, perhaps due to positive connotations associated with its complexity, only to fall out of favor  
1111 when its reliability, validity, and interpretability come into question (Smith et al., 1997). Our results  
1112 indicate that the complexity of techniques that associate particular damage types with particular host  
1113 plants, impressive as they may seem, require far more complete sampling than can be expected from  
1114 studies of insect herbivory on fossil leaves.

1115 These results also have implications for quantifying host specificity. At present, it is customary to  
1116 rank each damage type within an assemblage by its host specificity on a discrete scale of generalist (1),  
1117 intermediate specificity (2), or specialized (3). To avoid misinterpreting artifacts of incomplete sampling as  
1118 biological phenomena, these rankings are only assigned to damage types that occur on three or more plant  
1119 specimens. However, the findings presented in this section raise the question of whether three occurrences  
1120 of a damage type are sufficient to determine its host specificity, particularly if a damage type is classified as  
1121 specialized because all three of its occurrences are on the most abundant plant host at the assemblage.

#### 1122 9.4 RARE DAMAGE TYPES AND A COMPARISON OF ANGIOSPERM- AND 1123 NON-ANGIOSPERM-DOMINATED ASSEMBLAGES

1124 With size-based rarefaction, one could argue that higher damage type diversities in angiosperm-dominated  
1125 floras might become apparent at higher sample sizes. An analogous argument for coverage-based rarefaction  
1126 is that higher damage type diversities in angiosperm-dominated floras might become apparent at higher  
1127 levels of sample coverage. To evaluate this possibility, we repeated all coverage-based rarefaction analyses  
1128 by rarefying to a sample coverage of 0.9 instead of 0.8. This higher level of sample coverage incorporates  
1129 a greater number of rare damage types in diversity estimates, thus constituting a sensitivity analysis of  
1130 whether the similar damage type diversities estimated for Permian and Cenozoic assemblages in Figure 5  
1131 are attributable to the level of sample coverage to which the assemblages were rarefied.

1132 For each assemblage we calculated the difference in damage type diversity when rarefied to a sampling  
1133 coverage of 0.8 or 0.9 (Figure S7). We found that the differences are smallest for the Molteno assemblages  
1134 listed in Table 1, which contain relatively low damage type diversities. Although far more

1135 angiosperm-dominated assemblages have been evaluated for insect herbivory than  
1136 non-angiosperm-dominated assemblages outside of the Molteno Formation, the extent to which estimated  
1137 damage type diversity differs with sample coverage is similar among these two categories. Of note, when  
1138 sample coverage increases from 0.8 to 0.9, the four assemblages with the greatest increase in estimated  
1139 damage type diversity are the Hindon Maar, Eckfeld, Messel, and Bogotá assemblages, all of which are  
1140 angiosperm-dominated and contain high damage type diversities. To discern whether this great increase in  
1141 damage type diversity with heightened sample coverage is truly unique to angiosperm-dominated  
1142 assemblages, far more non-angiosperm-dominated assemblages will need to be evaluated for insect  
1143 herbivory.

1144 Insect herbivory from these four assemblages was described within the last ten years (Wappler et al.,  
1145 2012; Möller et al., 2017; Giraldo et al., 2021). Estimates of damage type diversity may be biased toward  
1146 assemblages that have been described most recently under a scenario in which existing damage types are have  
1147 increased in number (Dos Santos et al., 2020; Xiao et al., 2021). However, Giraldo et al. (2021) found that  
1148 this is not the case: a more conservative approach toward splitting damage types does not yield a noticeable  
1149 decrease in damage type diversity as standardized through rarefaction.

## 1150 9.5 THE NUMBER OF ITERATIONS NEEDED FOR RESAMPLING PROCEDURES

1151 To determine the number of iterations needed for the resampling procedures discussed in “Evaluating other  
1152 potential dimensions of an ecospace for herbivory,” we iteratively performed our suggested resampling  
1153 routine for quantifying uncertainty surrounding the offset between the prevalence of each plant host and  
1154 the prevalence of insect damage on it. For this procedure we used data from the Colwell Creek Pond  
1155 assemblage (Schachat et al., 2014) because surface area measurements are available. We found that the  
1156 width of the 84% confidence interval varies minimally whether 100 or 100,000 iterations of the resampling  
1157 routine are performed, but stabilizes around 5,000 iterations (Figure S8). Therefore, we recommend that  
1158 future studies use 5,000 resampling iterations to generate confidence intervals.

## 1159 9.6 CRITERIA FOR INCLUSION OF LEAVES AND DAMAGE TYPES

1160 As noted in the main text, C.C. Labandeira employs a wide definition of “foliage” that includes needles,  
1161 liverworts, phyllids, photosynthetic wings of seeds, and even flattened horsetail axes whereas S.R. Schachat  
1162 employs a narrower definition restricted to multi-veined broad leaves and leaves with a defined midvein.  
1163 (Workers who study angiosperm assemblages typically examine leaves that are at least 50% complete. No  
1164 specimens were removed from the raw datasets for any of the angiosperm-dominated assemblages analyzed

1165 here.) When deciding which specimens from published datasets (Prevec et al., 2009; Cariglino, 2018;  
1166 Labandeira et al., 2018; Liu et al., 2020; Bernardi et al., 2017) to include in the analyses presented here, we  
1167 employed a compromise definition that excludes needles, liverworts, phyllids, photosynthetic wings of seeds,  
1168 and flattened horsetail axes but includes scale leaves.

1169 The raw data for the Williamson Drive assemblage (Xu et al., 2018) preclude determinations of whether  
1170 many of the individual specimens represent, or at least contain, broadleaf foliage. Therefore, the plant  
1171 hosts from this assemblage included here are the five foliage types that were included in NMDS plot in the  
1172 original publication: *Sigillariophyllum* leaves, *Pseudomariopteris cordato-ovata*, *Annularia carinata*, *Lilpopia*  
1173 *raciborskii*, and *Macroneuropteris scheuchzeri*.

1174 The data for the Wuda flora (Feng et al., 2020) do not include assignments of damage types. Therefore,  
1175 damage types were tallied based on the descriptions in the text of the article. An exact count of broadleaf  
1176 specimens was unavailable due to the vast number of specimens examined. Because of the sparsity of insect  
1177 damage at Wuda, the amount of sample coverage for this entire dataset is 0.675—well short of the threshold  
1178 used here, 0.8. Our decisions about the Wuda plant taxa, therefore, are inconsequential, as this assemblage  
1179 cannot be included in Figure 5.

1180 The description of herbivory at the Lincang assemblage (Zhang et al., 2018) includes a number of  
1181 unrecognizable damage types. Because the abstract of Zhang et al. (2018) contains a count of damage  
1182 types that is restricted to those with numbers assigned in the Damage Guide (Labandeira et al., 2007), we  
1183 followed the authors' lead and included only those damage types in our analysis.

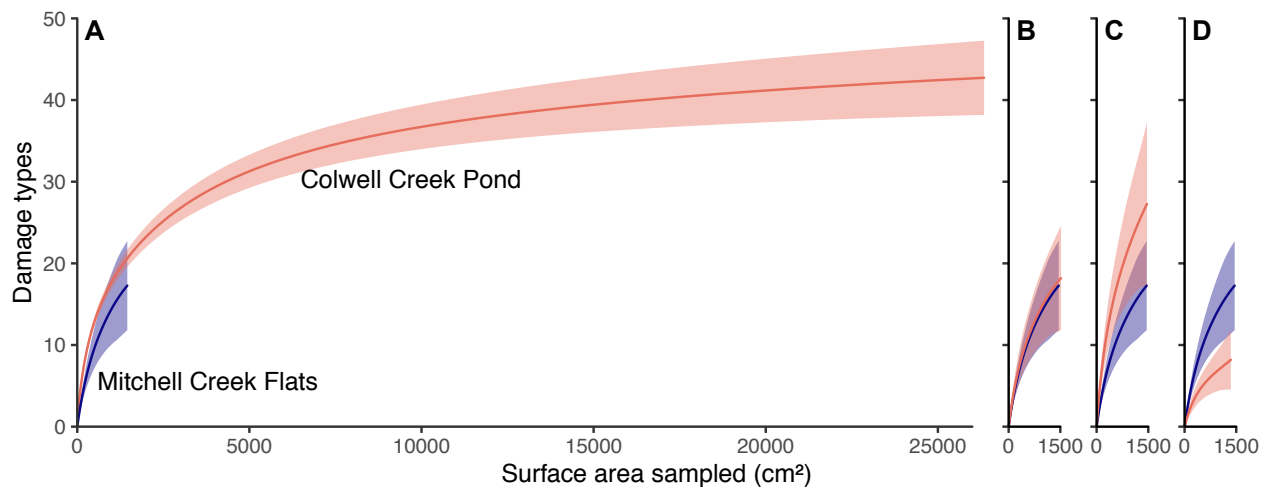

Figure S1: Rarefaction curves for two very similar assemblages: Colwell Creek Pond and Mitchell Creek Flats. **A** shows the rarefaction curves for all data from both assemblages. In **B** through **D**, the rarefaction curves for Colwell Creek Pond are calculated from a randomly subsampled set of leaves with nearly equal surface area to that measured at Mitchell Creek Flats.

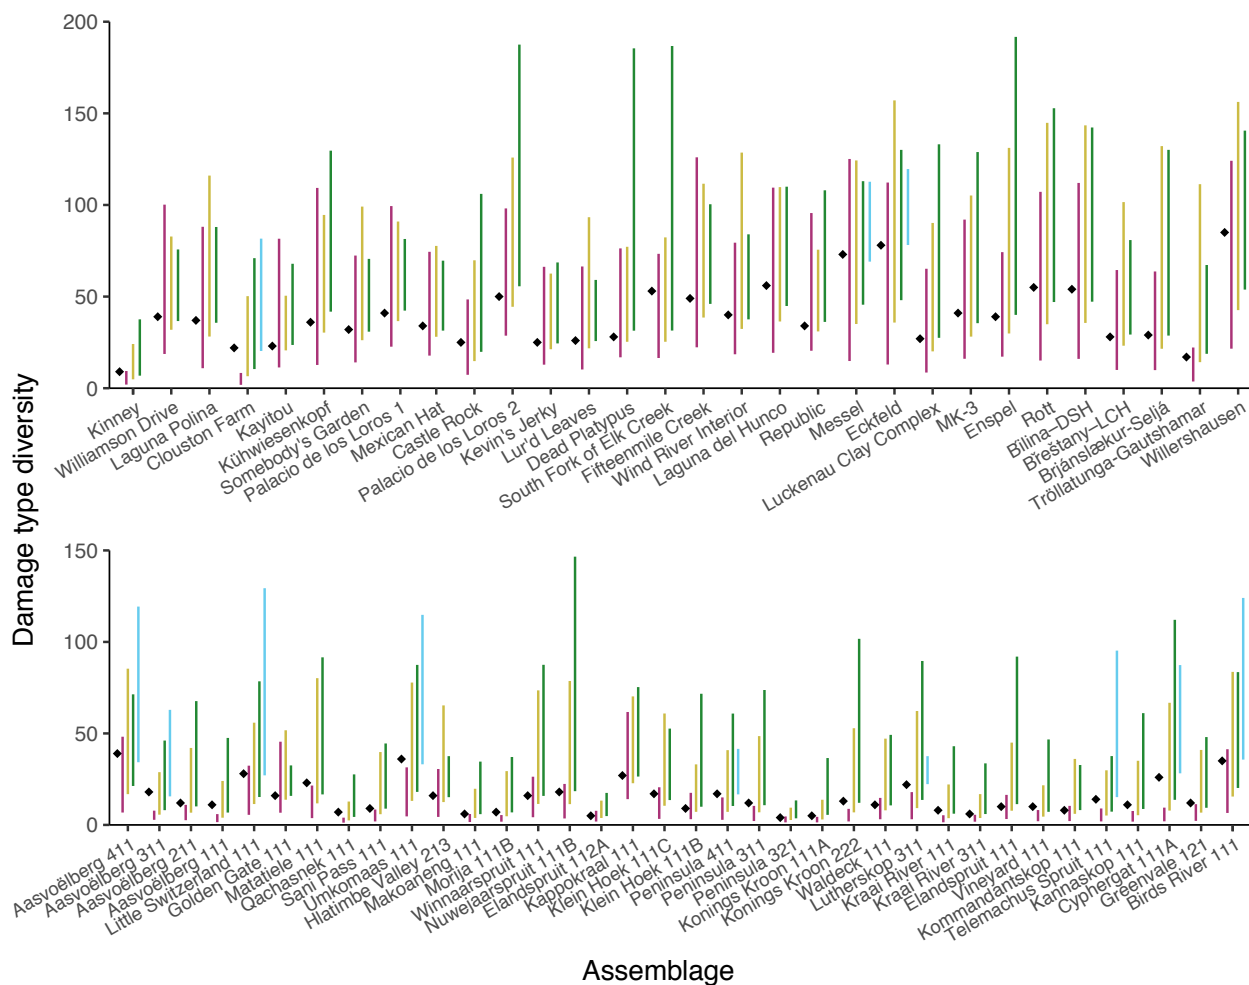

Figure S2: Precision and accuracy of the Chao1 estimator, examined by subsampling all assemblages listed in Tables 1 and 2. The black diamond denotes the raw damage type diversity observed at each assemblage and the lines denote the mean 95% confidence interval of the Chao1 estimator when used on a randomly sampled subset of leaves from the assemblage, as follows: magenta, 100 leaves; yellow, 500 leaves; green, 1,000 leaves; blue, 5,000 leaves. Not all assemblages contain sufficient material to subsample to 5,000 leaves. At low levels of sampling, the Chao1 estimator clearly underestimates damage type diversity. At higher levels of sampling, the Chao1 estimator becomes more accurate but far less precise.



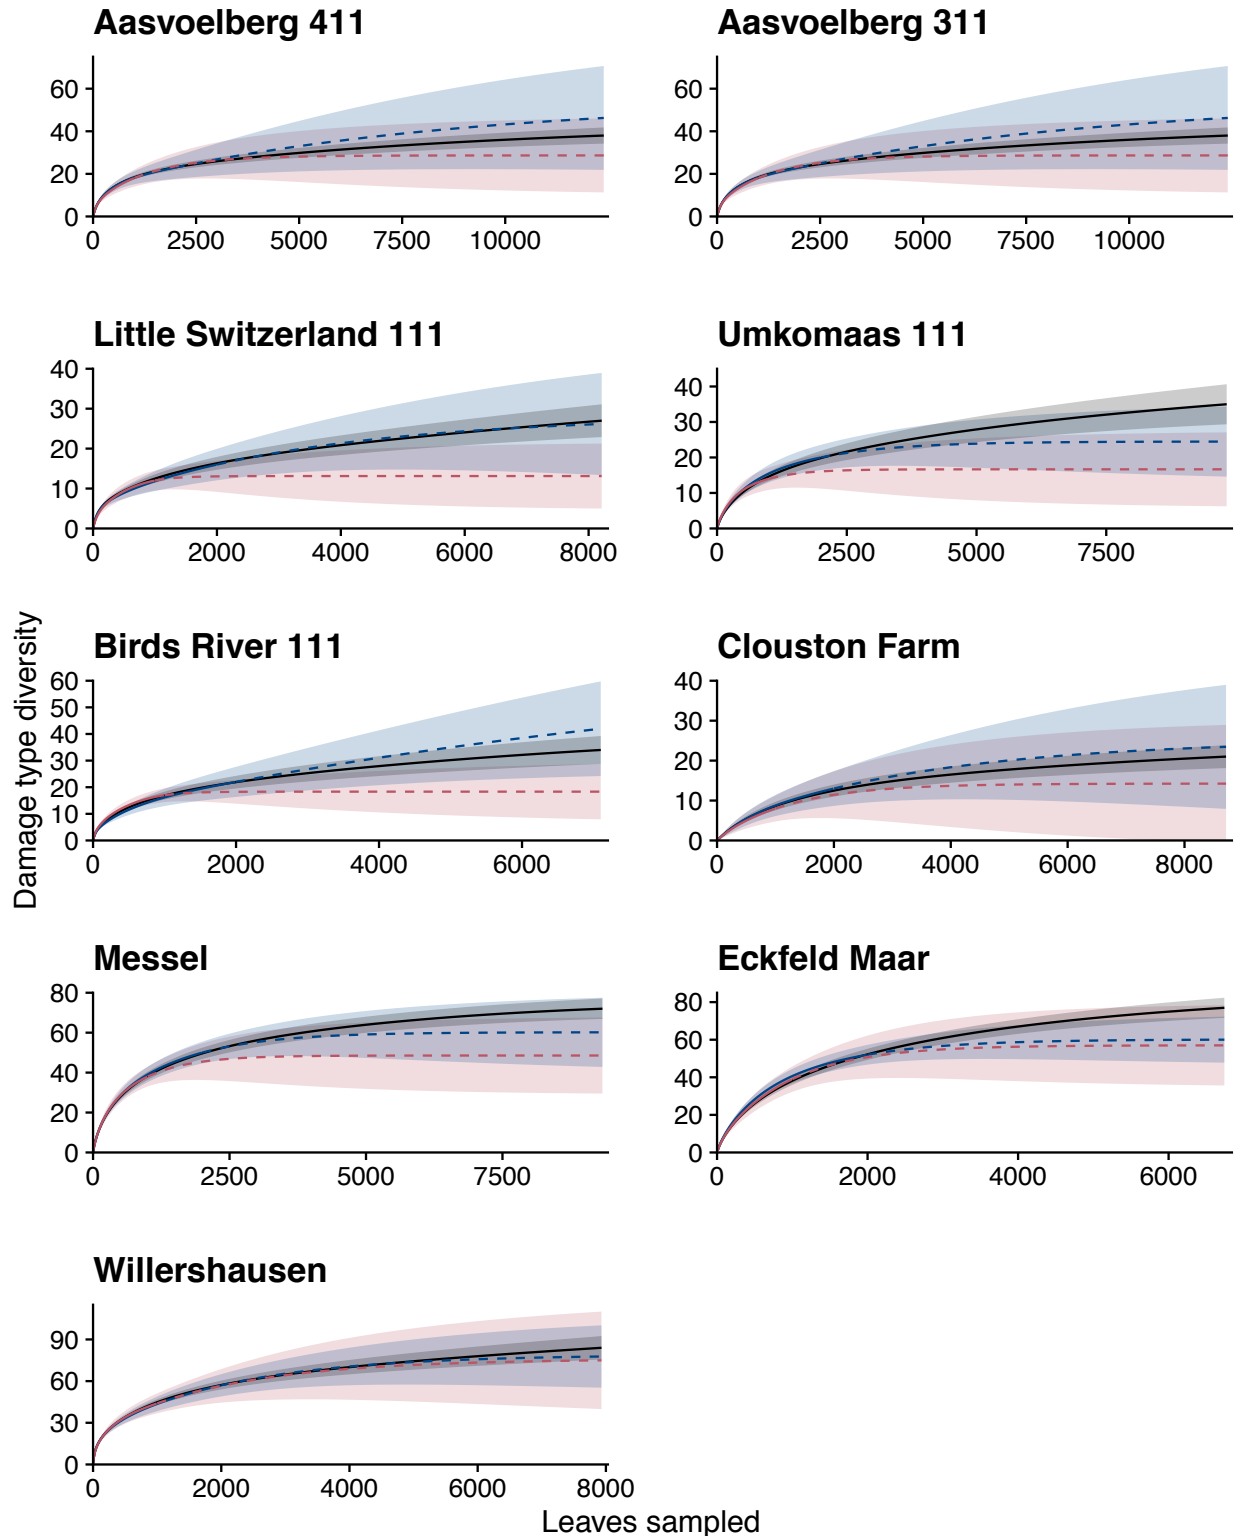

Figure S3: Precision and accuracy of estimates of damage type diversity generated with the method of Chao et al. (2014). Interpolated rarefaction curves are in solid lines and extrapolated curves are in dashed lines. The black lines represent the interpolated rarefaction curve for the raw dataset, the blue lines represent the raw dataset subsampled down to 2,000 leaves and then extrapolated to the number of leaves present in the raw dataset, and the red lines represent the raw dataset subsampled down to 1,000 leaves and then extrapolated to the number of leaves present in the raw dataset.

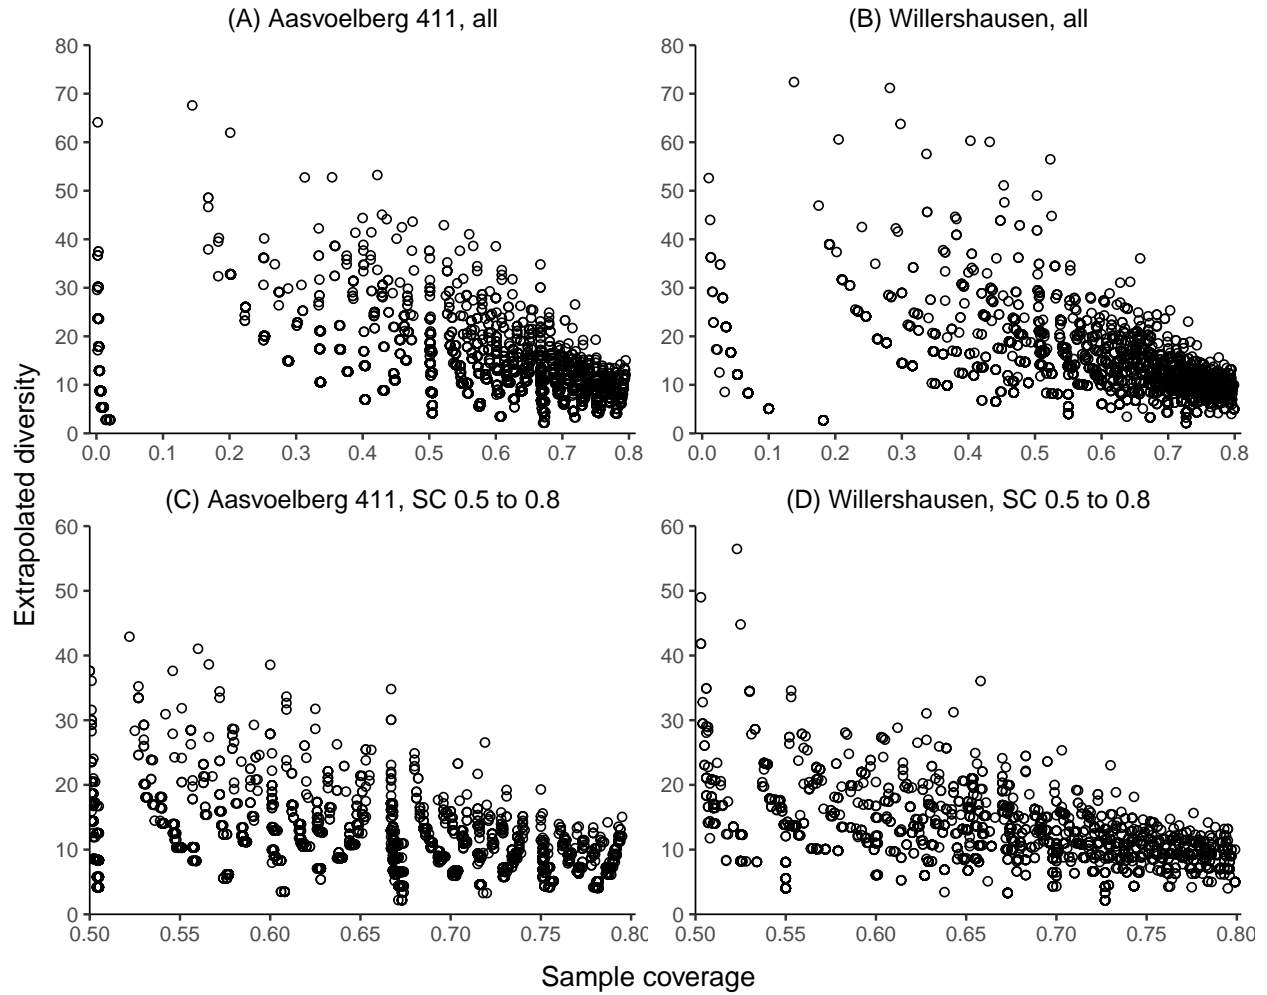

Figure S4: The variability of estimates of damage type diversity at a sample coverage of 0.8 when extrapolated from 1,000 subsampled leaves that yield a sample coverage below 0.8.

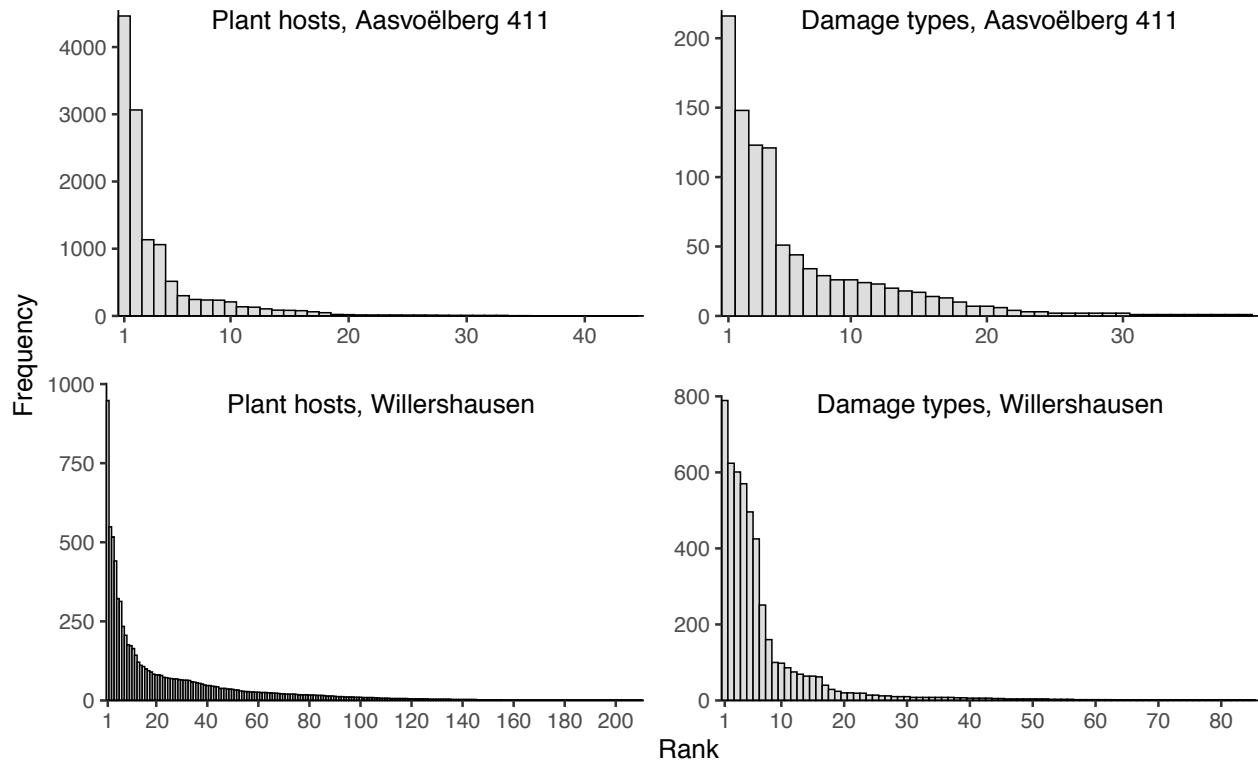

Figure S5: Dominance-diversity distributions for plant hosts and damage types at the pre-angiosperm assemblage with the largest number of leaves examined, Aasvoëlberg 411 (Labandeira et al., 2018), and the angiosperm assemblage with the largest number of leaves examined, Willershausen (Adroit et al., 2018).

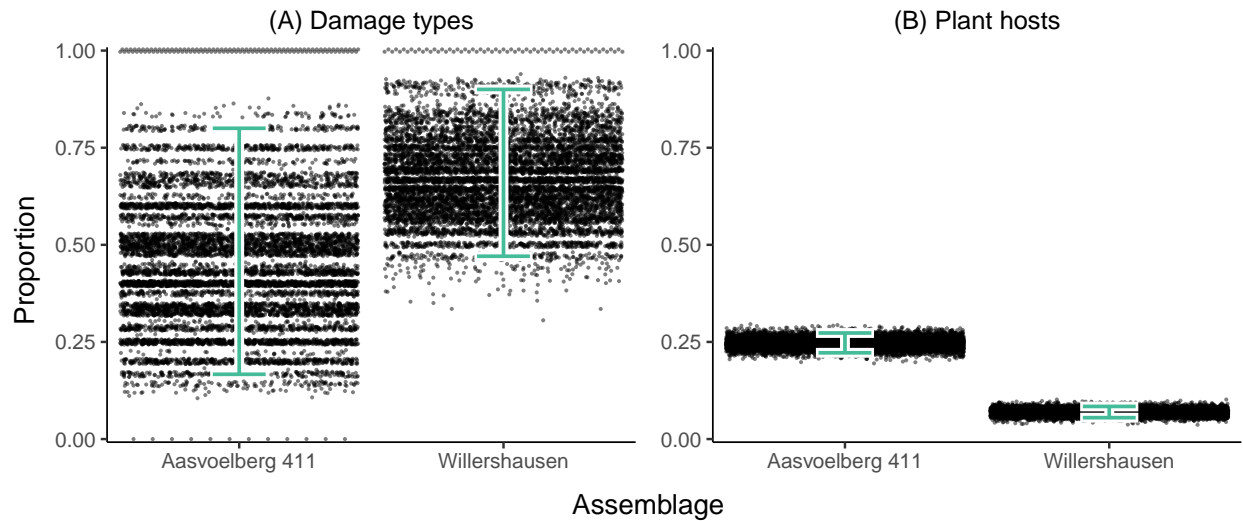

Figure S6: Measures of community structure at Aasvoëlberg 411 and Willershausen, the two assemblages featured in Figure S5, calculated by subsampling each assemblage to 1,000 leaves. Panel (a) shows the proportion of damage types on the second-most-abundant plant host that also occur on the most abundant plant host. Panel (b) shows the number of leaves belonging to the second-most-abundant plant host divided by the number of leaves belonging to the most abundant plant host. The lines denote 95% confidence intervals.

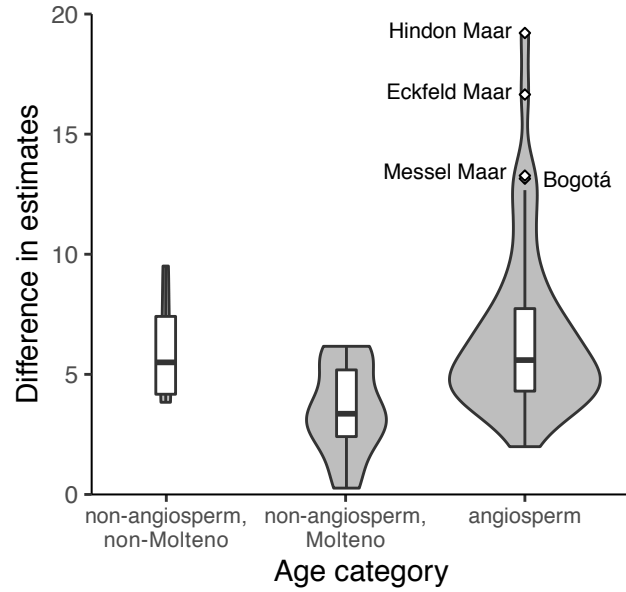

Figure S7: The difference in estimated damage type diversity when the sample coverage used in rarefaction increases from 0.8 to 0.9. The width of each violin represents the number of assemblages it contains. Boxplots are overlain atop each violin.

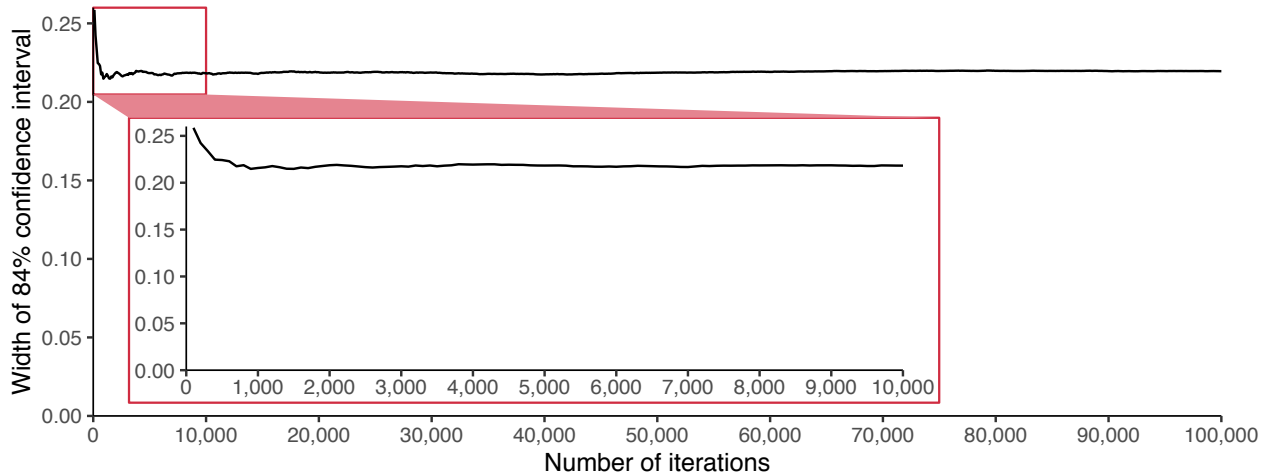

Figure S8: Changes in the width of the 84% confidence interval as the resampling procedure is further iterated.
